# Supplementary material for: An MPER antibody neutralizes HIV-1 using germline features shared among donors
Source: PubMed Central journal article supplement (PMC6879610; doi:10.1038/s41467-019-12973-1), 2019-11-26
Supplement: 41467_2019_12973_MOESM1_ESM.pdf [file 41467_2019_12973_MOESM1_ESM.pdf]

# **Supplementary Information**

**An MPER Antibody Neutralizes HIV-1 Using Germline Features Shared Among Donors**

**Zhang *et al.***

**List of Content**

**Supplementary Figures 1-9**

**Supplementary Tables 1-8**

**a**

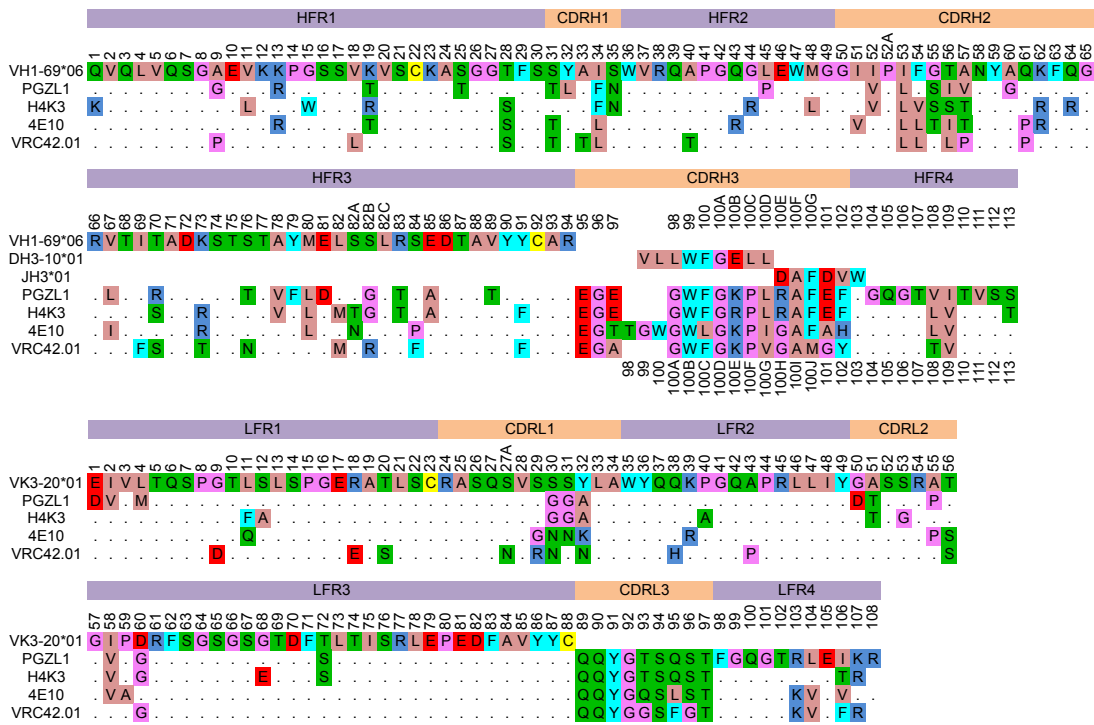

**b**

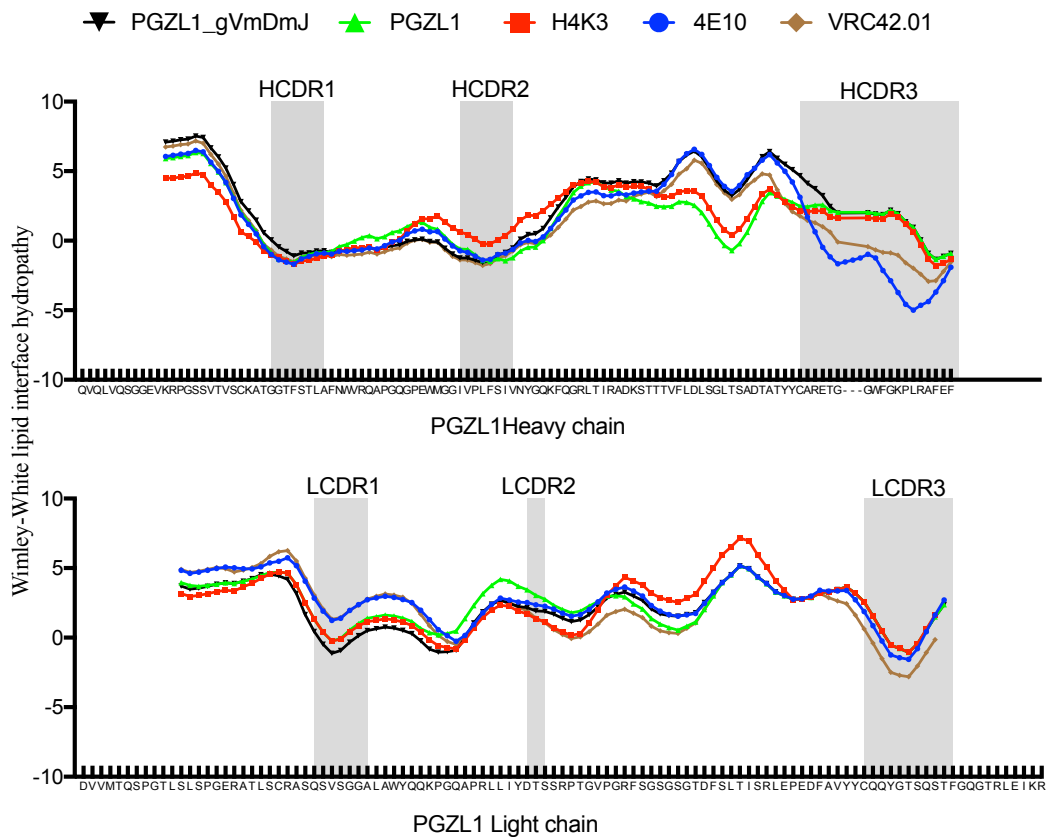

**Supplementary Figure 1.** Amino-acid sequence and calculated lipid insertion propensity of MPER bnAbs. **a** Amino-acid alignment of PGZL1, H4K3, 4E10 and VRC42.01. Amino acid residues are colored by their physico-chemical properties: pink, aliphatic; orange, aromatic; magenta, Gly and Pro; yellow, Cys; green, hydrophilic; red, acidic; blue, basic. The CDRs are indicated according to Kabat. **b** Lipid insertion propensity plots of the five antibodies for the heavy chains (top panel) and light chains (bottom panel). Lipid insertion property was calculated using the Wimley-White lipid interface hydropathy scale as computed with MPEX software; curve smoothing utilized the default window size of 19 amino acids. Source data for panel (b) is provided as a Source Data file.

**a Germline gene distribution (Donor PG13)**

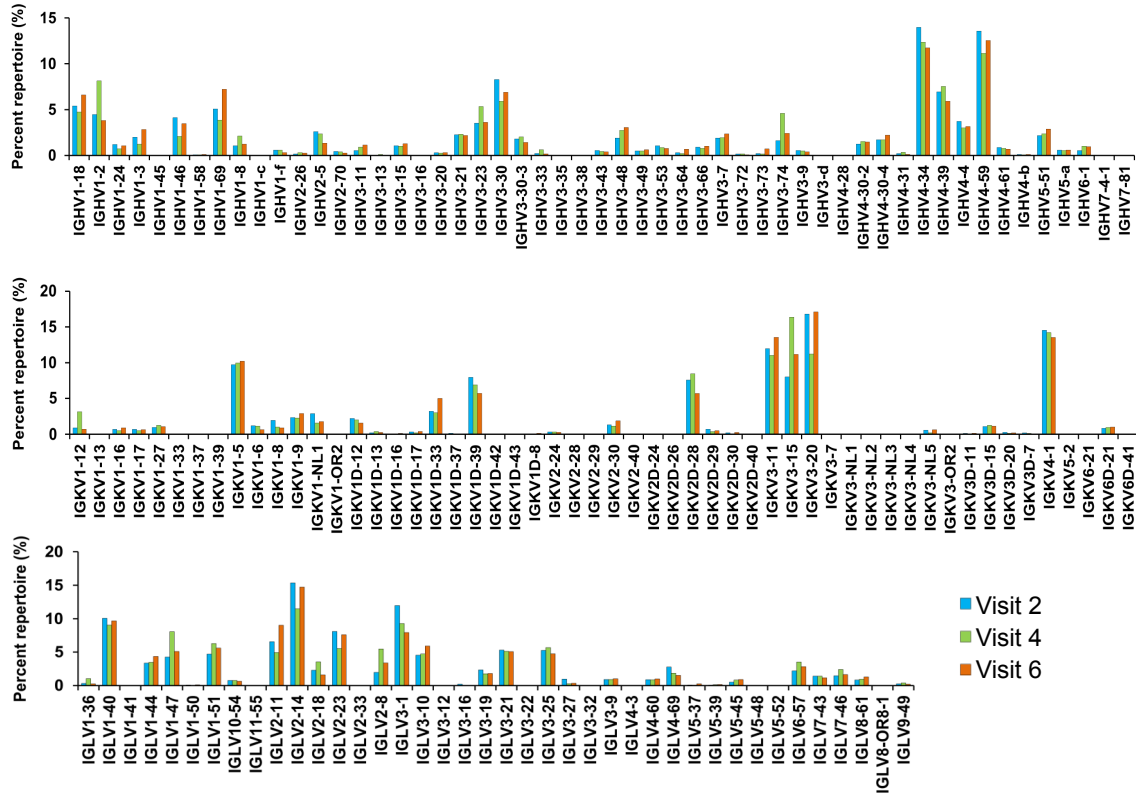

**b Somatic hypermutation distribution (Donor PG13)**

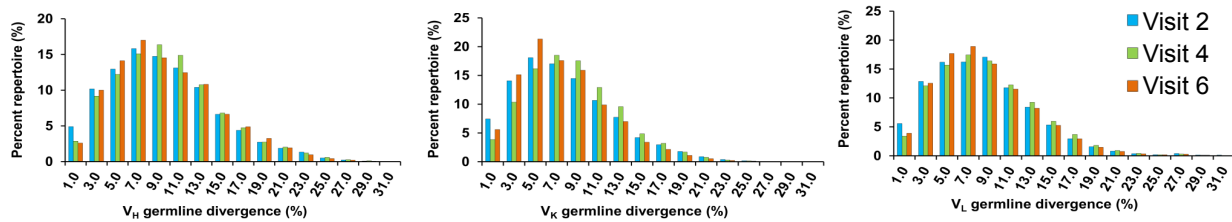

**c CDR3 length distribution (Donor PG13)**

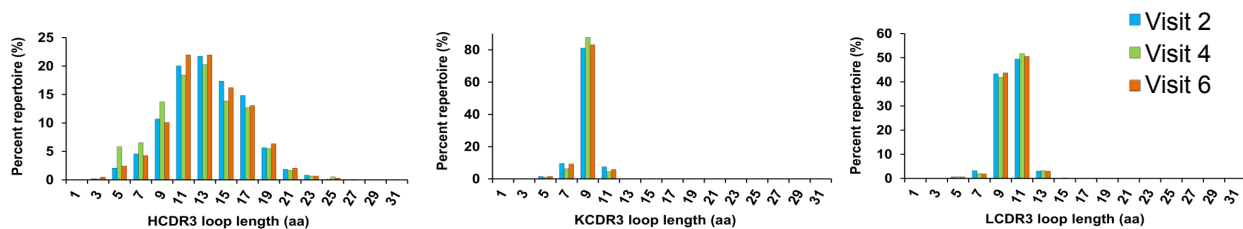

**Supplementary Figure 2.** Unbiased B cell repertoire profiles of donor PG13 at three time points. Distributions are plotted. **a** Germline V gene usage for heavy and light ( $\kappa$  and  $\lambda$ ) chains. **b** Germline gene divergence, or extent of SHM. **c** CDR3 loop length (H, heavy chain; K,  $\kappa$  chain; L,  $\lambda$  chain). Color coding denotes the time point analyzed, with sample visits V2 shown in blue, V4 in green, and V6 in orange.

**a**

| Visit | CDR3 identity<br>>80% (HC),<br>>85% (KC) | Translatable to<br>amino acid<br>sequences | Non-<br>redundant<br>sequences | Clustering<br>based on a<br>SeqID of 90% | SeqID-based selection<br>of representative<br>sequences |
|-------|------------------------------------------|--------------------------------------------|--------------------------------|------------------------------------------|---------------------------------------------------------|
| #2    | 727 HCs                                  | 555 HCs                                    | 366 HCs                        | 65 HC clusters                           | 10 HC representatives                                   |
|       | 93 KCs                                   | 23 KCs                                     | 22 KCs                         | 10 KC clusters                           | 4 KC representatives                                    |
| #4    | 759 HCs                                  | 597 HCs                                    | 377 HCs                        | 48 HC clusters                           | 8 HC representatives                                    |
|       | 112 KCs                                  | 28 KCs                                     | 28 KCs                         | 12 KC clusters                           | 3 KC representatives                                    |
| #6    | 853 HCs                                  | 644 HCs                                    | 460 HCs                        | 79 HC clusters                           | 9 HC representatives                                    |
|       | 141 KCs                                  | 14 KCs                                     | 14 KCs                         | 8 KC clusters                            | 3 KC representatives                                    |

**b**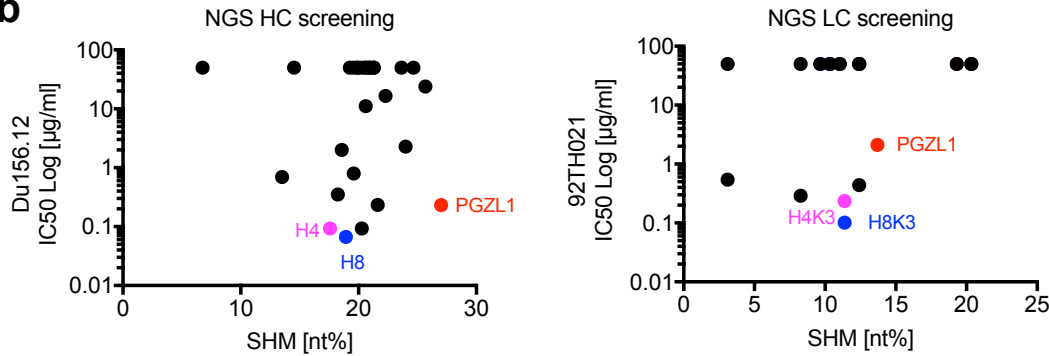**c**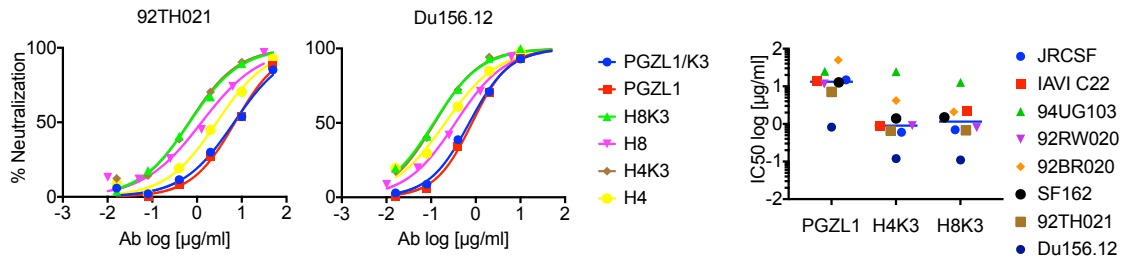**d**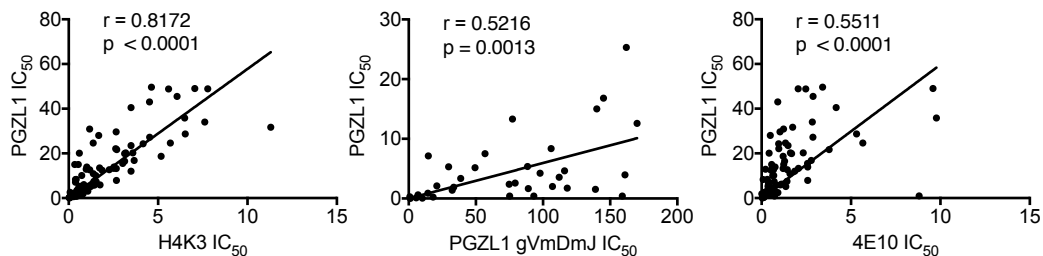

**Supplementary Figure 3.** Neutralization of HIV-1 by PGZL1 recombinant antibodies selected from NGS lineage analysis of the Donor PG13 antibody repertoire. **a** Details of bioinformatics procedure used for selecting PGZL1-like sequences. **b** Scatter plots showing neutralization ( $IC_{50}$ ) of HIV-1 isolate Du156.12 vs SHM (nucleotide level, nt%) with heavy chains (HC) that were initially paired with the wildtype PGZL1 light chain (left panel). From this screen, the heavy chains that yielded the highest neutralization potency, H4 and H8, were subsequently paired with a panel of light chains (LC) and subsequently assayed for neutralization of HIV-1 isolate 92TH021 (right panel). **c** Neutralization curves of 92TH021 and Du156.12 by PGZL1 and NGS recombinant variants are shown on the left and middle panels, respectively. On the right panel,  $\log IC_{50}$ s are plotted for each antibody against the 6-isolate cross-clade panel. **d** Correlation of neutralization ( $IC_{50}$ s) against a 130-member panel of HIV isolates comparing PGZL1 and H4K3 (left panel,  $n=89$ ,  $r=0.8172$ ,  $p<0.0001$ ), PGZL1 and PGZL1 gVmDmJ (middle panel,  $n=35$ ,  $r=0.5216$ ,  $p=0.0013$ ), as well as PGZL1 and 4E10 (right panel,  $n=89$ ,  $r=0.5511$ ,  $p<0.0001$ ). Source data for panels (b), (c), (d) are provided as a Source Data file.

**a**

|              |                                                                            |             |                                                                                      |
|--------------|----------------------------------------------------------------------------|-------------|--------------------------------------------------------------------------------------|
|              | 92 93 94 95 96 97 98 99 100 100A 100B 100C 100D 100E 100F 100G 101 102 103 |             | 92 93 94 95 96 97 98 99 100 100A 100B 100C 100D 100E 100F 100G 100H 100I 101 102 103 |
| PGZL1_CDRH3  | CAREGEG <b>WFGKPLR</b> AF <b>EFW</b>                                       | 4E10_CDRH3  | CAREGTTGWG <b>WL</b> GK <b>P</b> IG <b>A</b> FA <b>HW</b>                            |
| D3-10*01     | VLL <b>W</b> FG <b>E</b> LL                                                | D3-10*01    | VLL <b>W</b> FG <b>E</b> LL                                                          |
| J3*01        |                                                                            | J4*03       | <b>YFDYW</b>                                                                         |
| PGZL1_gVmDmJ | CAREGEG <b>WFGKPLR</b> AF <b>EFW</b>                                       | 4E10_gVmDmJ | CAREGTTGWG <b>WL</b> GK <b>P</b> IG <b>A</b> FA <b>HW</b>                            |
| PGZL1_gVgDgJ | CAREGEG <b>W</b> FG <b>E</b> PL <b>R</b> AF <b>D</b> V <b>W</b>            | 4E10_gVgDgJ | CAREGTTGWG <b>W</b> FG <b>E</b> P <b>I</b> G <b>Y</b> FD <b>YW</b>                   |

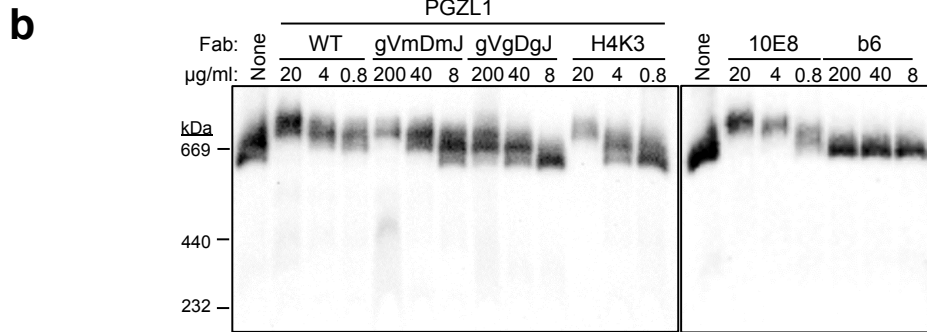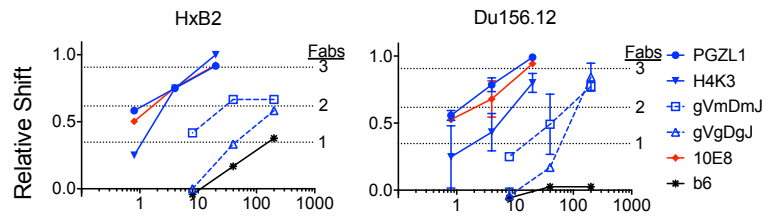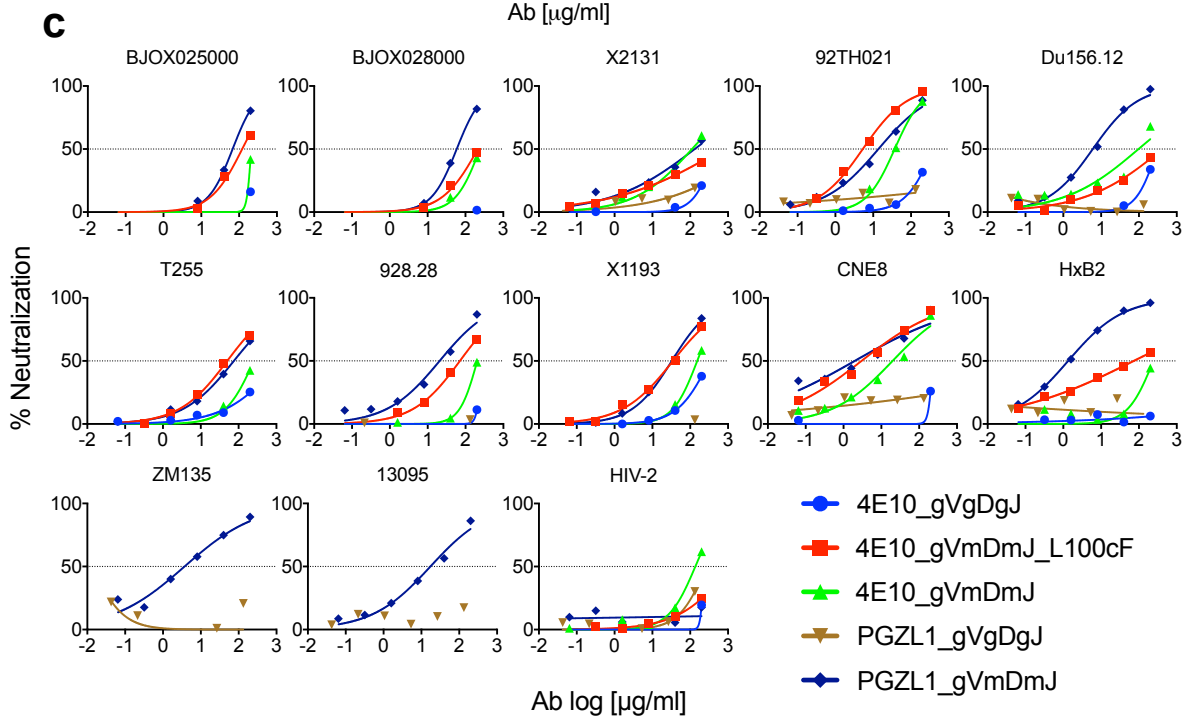

**Supplementary Figure 4.** CDRH3 sequences, HIV Env binding characteristics, and HIV neutralization of inferred germline precursors of PGZL1 and 4E10. **a** Inferred CDRH3 germline sequences were aligned to those of PGZL1 and 4E10. Residues conserved from germline are in bold black, and SHMs are in red. **b** BN-PAGE Env mobility shift assay. BN-PAGE Western blot analysis of HIV Env ADA-CM and relative gel mobility shift in the presence of PGZL1 variant antibodies was performed as in Fig. 2. Gel mobility shift data were also acquired for HIV-1 HxB2 and Du156.12. Relative gel mobility shifts were calculated as described in Fig. 2 for ADA-CM. The error bars represent the standard deviation of n=2 biologically independent experiments. **c** Neutralization of indicated PGZL1 and 4E10 inferred germline antibodies against 13 HIV pseudoviruses in the TZM-bl assay. Source data for panels (b), (c) are provided as a Source Data file.

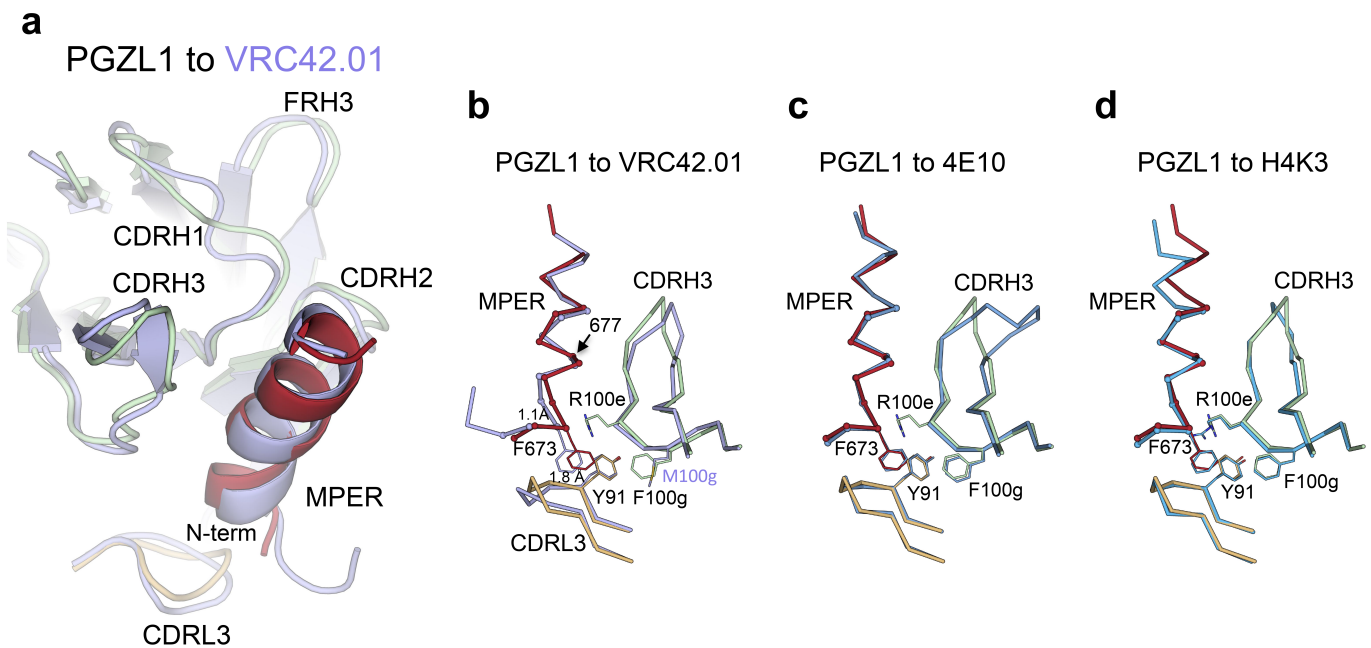

**Supplementary Figure 5.** PGZL1 and VRC42.01 structure comparison. **a** Superposition of variable domain of PGZL1 (green-HC; yellow-LC; red-MPER) to VRC42.01 (blue; PDB 6MTO) reveals slight differences in the position of the MPER N-term region. **b** Zoom into the superposition of PGZL1 (green-HC; yellow-LC; red-MPER) to VRC42.01 (blue) highlighting aromatic residues (sticks) in the combining site and N-term region of the epitope.  $C\alpha$  atoms of  $F_{673}$  in the two structures are 1.1 Å apart and equivalent atoms of their aromatic rings are up to 1.8 Å apart. The position of  $F_{100g}$  in PGZL1 corresponds to  $M_{100g}$  in VRC42.01. Residue 677 is an asparagine in our MPER peptide and a lysine in the MPER in the VRC42.01 structure and is indicated with an arrow. **c** Zoom into the superposition of PGZL1 (green-HC; yellow-LC; red-MPER) to 4E10 (blue; PDB 2FX7) shows similar positions of the MPER epitope and Fab residues (sticks) in the two structures. **d** Zoom into the superposition of PGZL1 (green-HC; yellow-LC; red-MPER) to H4K3 (blue) shows similar positions of the MPER epitope and Fab residues (sticks) in the two structures.  $C\alpha$  atoms of the MPER epitope residues interacting with each antibody are shown as small spheres in panels (b), (c), (d).

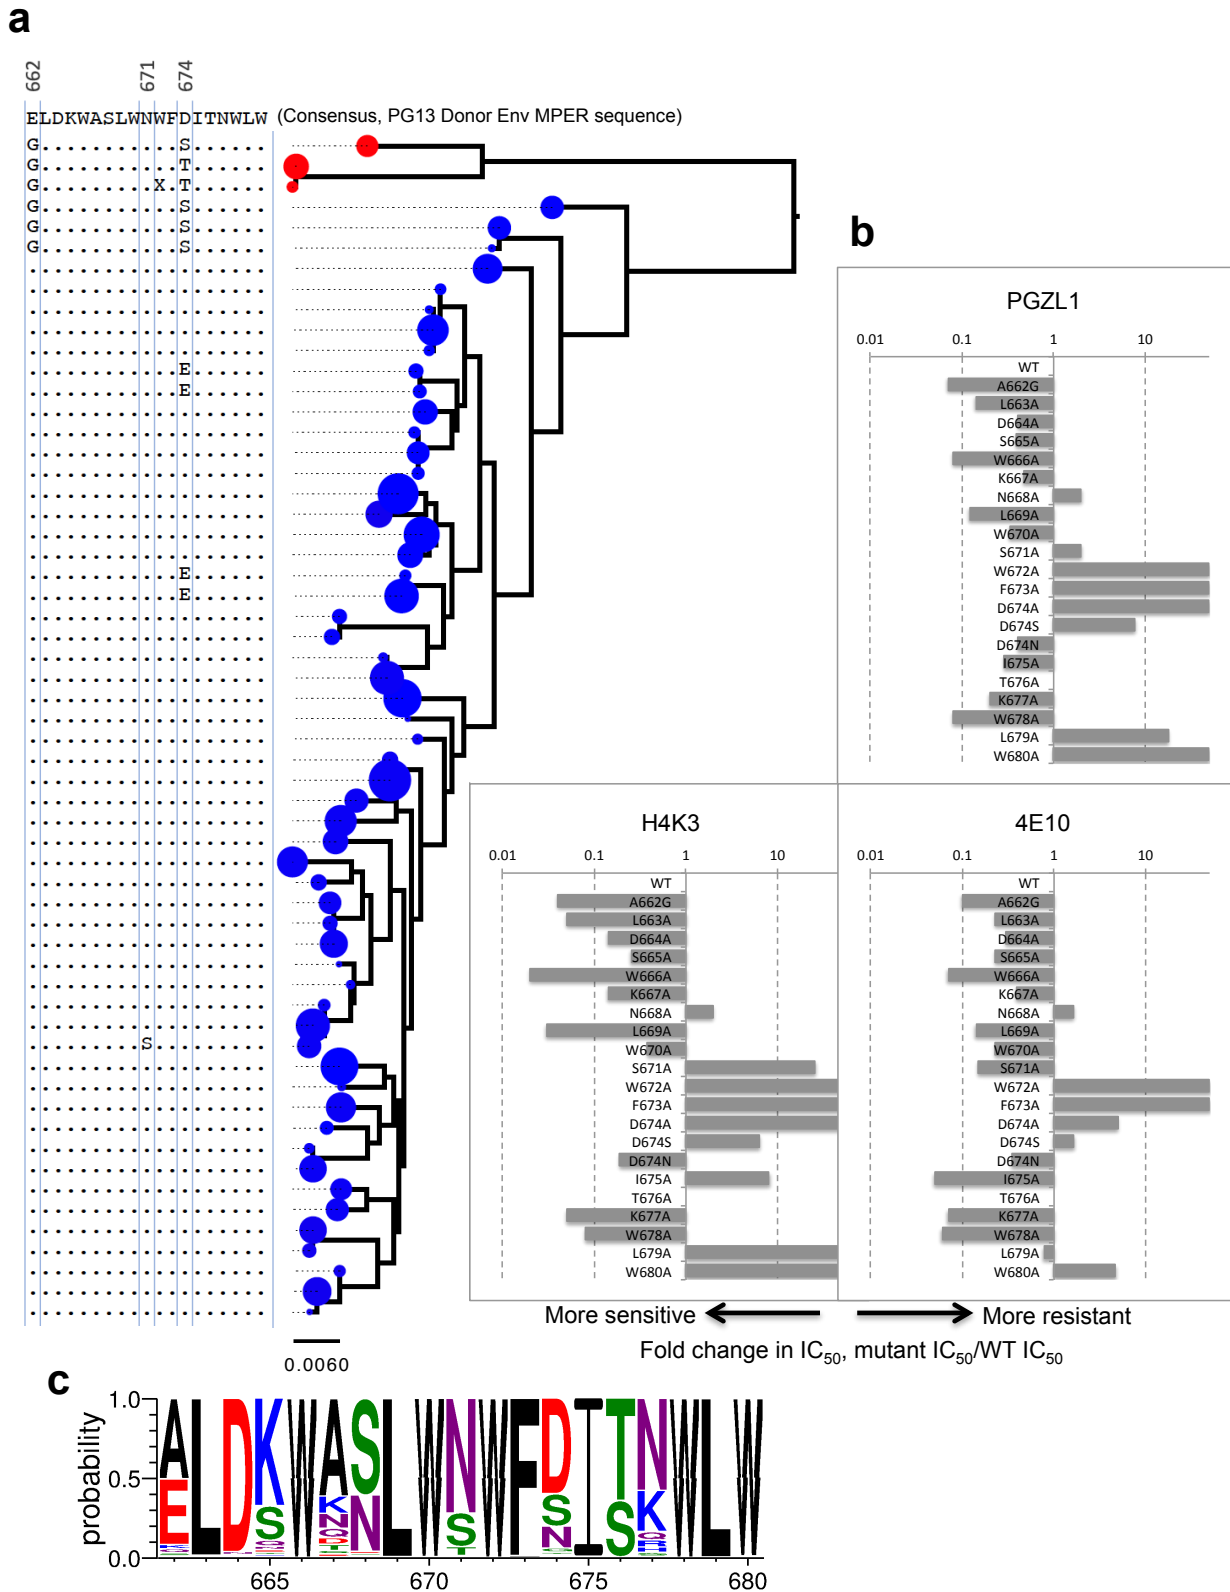

**Supplementary Figure 6.** Isolation and phylogenetic analysis of PG13 donor Envs and sensitivity of HIV COT6 MPER mutants to neutralization by PGZL1 antibodies. **a** Alignment of MPER sequences obtained from Envs rescued from plasma-derived viral RNA of donor PG13 using long-read NGS. An X in the MPER sequence represents a stop codon. The adjacent phylogeny is annotated with circles whose size corresponds to the number of variant frequency and whose color indicates whether the Env is predicted to be CXCR4-tropic (red) or CCR5-tropic (blue). The units of the scale bar are nucleotide substitutions per site. **b** Relative neutralization sensitivity of HIV COT6.15 wildtype vs COT6.15 MPER mutants to PGZL1, H4K3 and 4E10 antibodies. Results are reported as fold-increase in IC<sub>50</sub> relative to wildtype COT6.15. **c** Logoplot of MPER sequence for all Envs in the LANL database. Source data for panel (b) is provided as a Source Data file.

**a**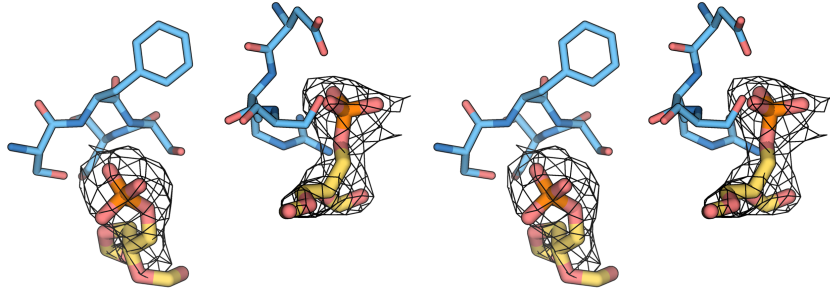**b**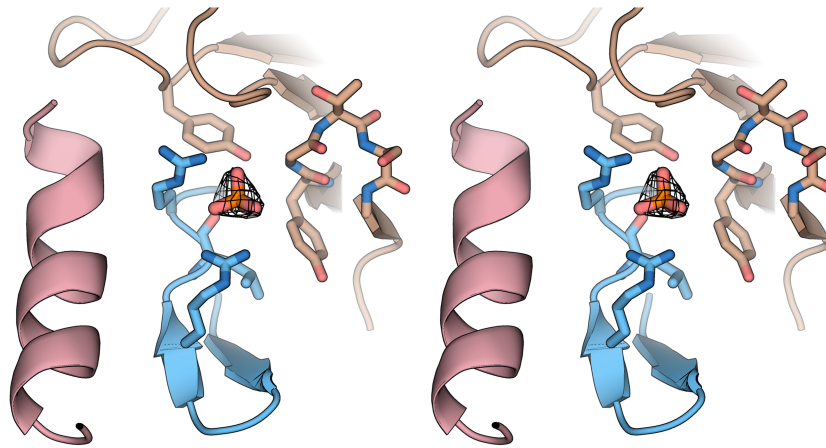**c**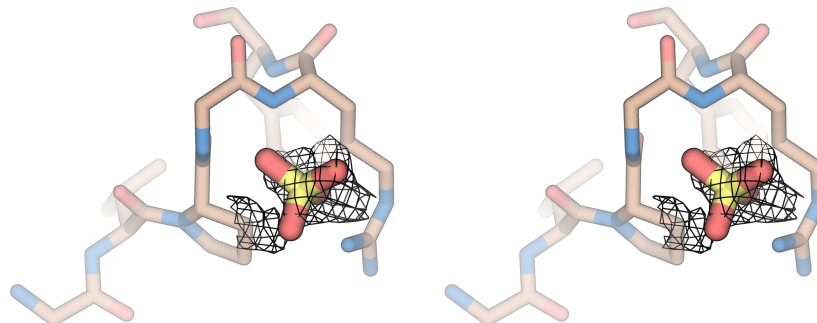

**Supplementary Figure 7.** Stereo images of the electron density maps illustrating binding of the ligands. **a** Stereo image of the initial Fo-Fc map ( $3\sigma$  level; black mesh) for two 06:0 PA (yellow sticks) bound to H4K3 residues (blue sticks). **b** Stereo image of the initial Fo-Fc map ( $3\sigma$  level; black mesh) corresponding to a bound PO<sub>4</sub> (orange). H4K3 residues are shown as sticks (blue - HC and brown - LC) and MPER<sub>671-683</sub> as pink helix. **c** Stereo image of the initial Fo-Fc map ( $3\sigma$  level; black mesh) corresponding to a bound SO<sub>4</sub> (yellow) surrounded by H4K3 residues (brown sticks).



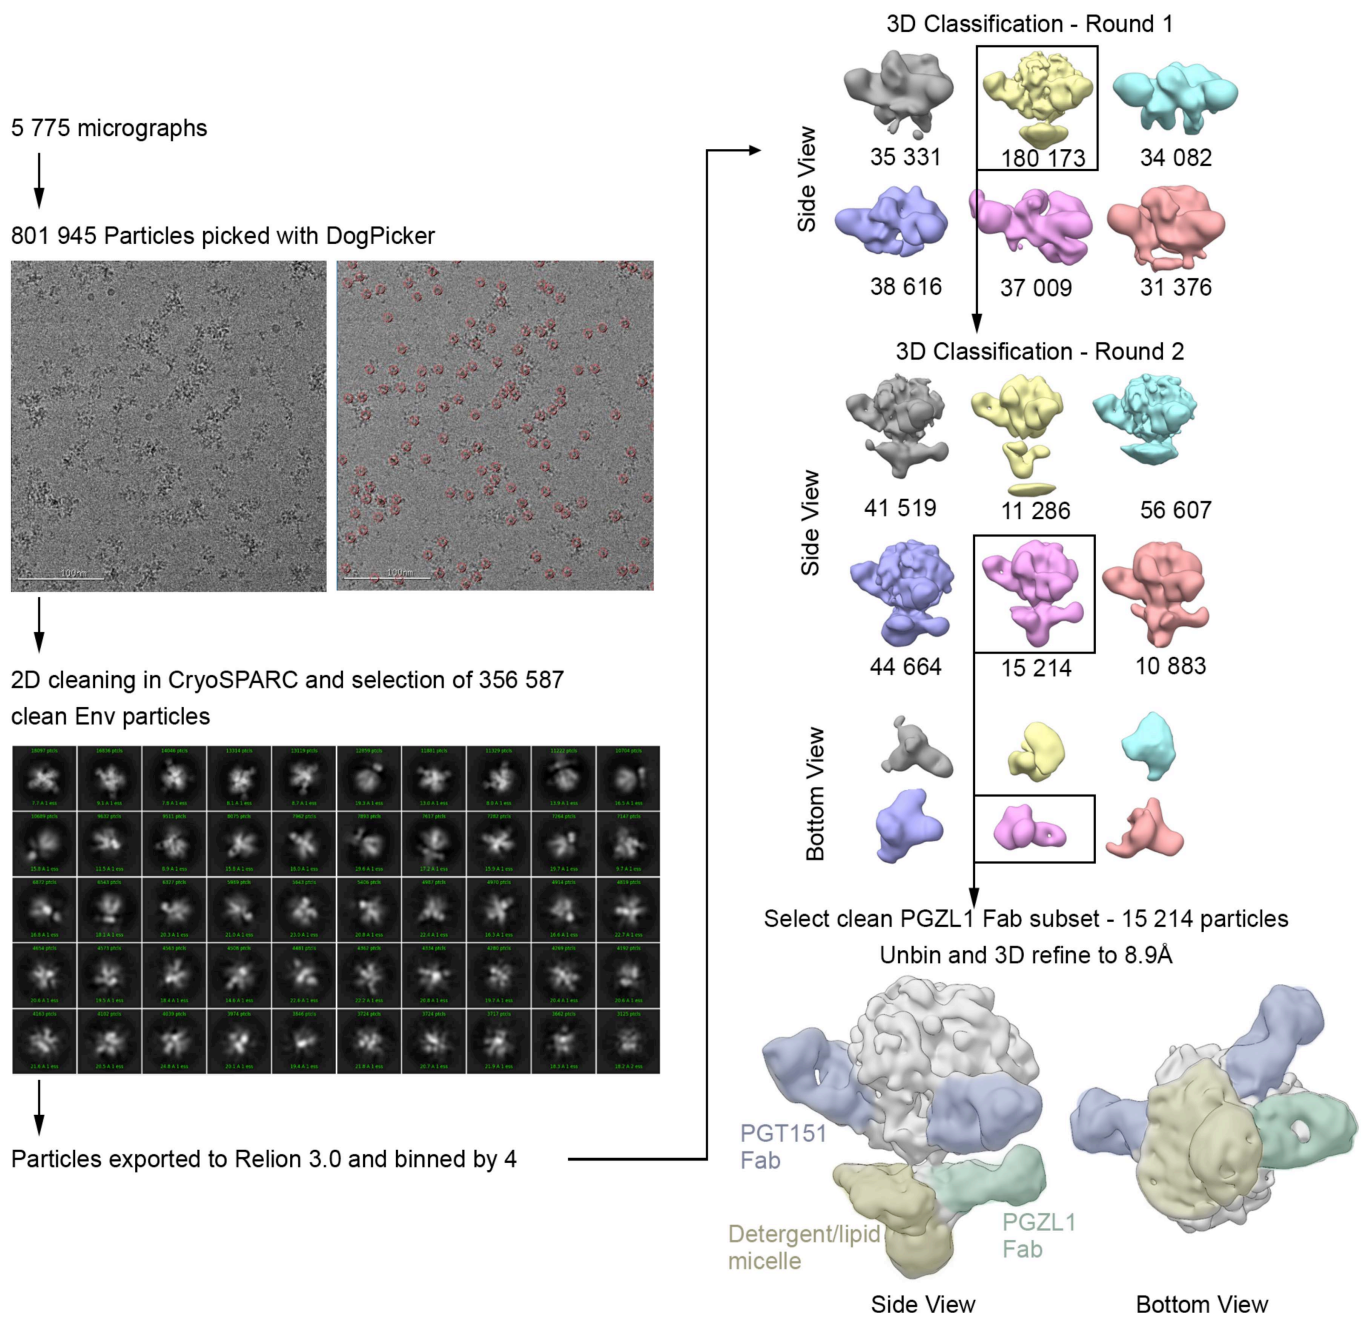

**Supplementary Figure 8.** Cryo-EM data processing workflow for full-length AMC011 Env with PGZL1 and PGT151 Fabs. Particles were picked with DoGPicker and after 2D classification in cryoSPARC, clean particle stack was further curated with two rounds of 3D classification, yielding a final class of 15214 particles with one PGZL1 Fab and two PGT151 Fabs per Env trimer and refined to 8.9 Å resolution.

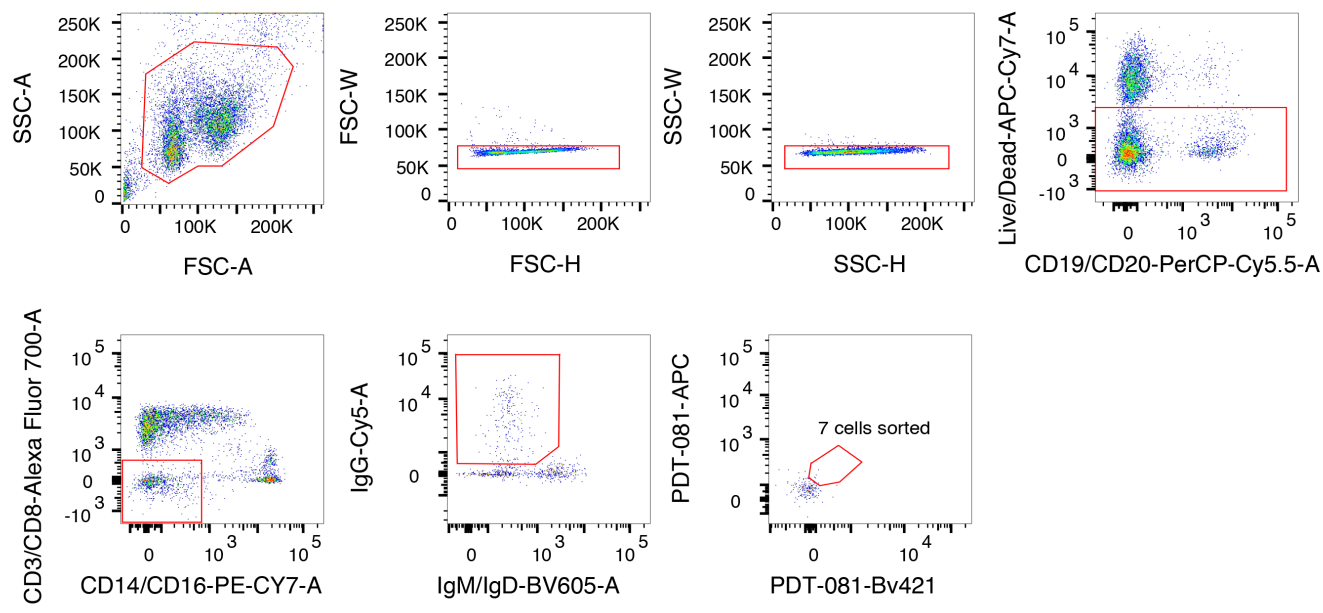

**Supplementary Figure 9.** FACS strategy for isolating single MPER-specific B cells.

**Supplementary Table 1.** Neutralization of HIV-1 and HIV-2 (HIV-1 MPER) chimera viruses by PG13 donor serum and mAbs

| Virus                       | MPER                        | PG13 Plasma ( $\pm$ competitor) <sup>a</sup> |      | Monoclonal Ab (IC <sub>50</sub> $\mu$ g/ml) |       |       |
|-----------------------------|-----------------------------|----------------------------------------------|------|---------------------------------------------|-------|-------|
|                             |                             | -                                            | +    | PGZL1                                       | H4K3  | 4E10  |
| HIV-2 C1                    | ELLALDKWASLWNWFDITKWLWYIK   | 6400                                         | 940  | 0.98                                        | n.d.  | 0.80  |
| HIV-2 C3                    | ELLALDKWASLWNWFDLASWVKYIQ   | <80                                          | n.d. | >10                                         | >10   | >10   |
| HIV-2 C4                    | ELQKLNSWDVFGNWFNFDITKWLWYIK | 6400                                         | n.d. | 2.38                                        | 1.17  | 1.41  |
| HIV-2                       | ELQKLNSWDVFGNWFNFDLASWVKYIQ | <80                                          | n.d. | >10                                         | >10   | >10   |
| HIV-1 Du156.12              | DLLALDRWQNLWNWFDITNWLWYIK   | 1140                                         | 280  | 0.623                                       | 0.270 | 0.101 |
| HIV-1 Du156.12 <sup>b</sup> | DLLALDRWQNLWNWFDITNWLWYIK   | 1140                                         | 1911 | 0.623                                       | 0.270 | 0.101 |

<sup>a</sup>ID<sub>50</sub> in reciprocal plasma dilution against each virus in the presence (+) or absence (-) of 10  $\mu$ g/ml MPER peptide (residues 654-683). n.d., not determined.

<sup>b</sup>The fusion peptide (residues 512-534) was used as competitor.

**Supplementary Table 2.** Germline gene usage and characteristics of HIV-1 MPER bnAbs

| Abs      | Putative heavy chain gene alleles |             |          | V (nt%)<br>mutation<br>frequency | HCDR3 aa sequence        | HCDR3<br>length<br>(aa) | Isotype |
|----------|-----------------------------------|-------------|----------|----------------------------------|--------------------------|-------------------------|---------|
| PGZL1    | IGHV1-69*06                       | IGHD3-10*01 | IGHJ3*01 | 20.9                             | EGEGWFGKPLRAFEF          | 15                      | IgG1    |
| 4E10     | IGHV1-69*10                       | IGHD3-10*01 | IGHJ4*03 | 6.8                              | EGTTGWGWLGKPIGAFAH       | 18                      | IgG3    |
| VRC42.01 | IGHV1-69*10                       | IGHD3-10*01 | IGHJ4*03 | 10.8                             | EGAGWFGKPVGAMGY          | 15                      | IgG1    |
| 10E8     | IGHV3-15*05                       | IGHD3-3*01  | IGHJ1*01 | 21.5                             | TGKYDFWWSGYPPGEEYFQD     | 20                      | IgG3    |
| DH511.2  | IGHV3-15*01                       | IGHD3-3*01  | IGHJ6*03 | 17.6                             | TMDEGTPVTRFLEWGYFYFYMAV  | 23                      | IgG3    |
| DH517    | IGHV4-34*01                       | IGHD3-16*01 | IGHJ6*01 | 18.1                             | ARGTGVVVGGSWTVPPGMAYYLDV | 24                      | IgG3    |
| Z13      | IGHV4-59*03                       | IGHD2-15*01 | IGHJ6*03 | 17.7                             | VAIGVSGFLNYYYYMDV        | 17                      | N.D.    |
| 2F5      | IGHV2-5*02                        | IGHD3-3*01  | IGHJ6*02 | 12.1                             | RRGPTTSSGVPIARGPVNAMDV   | 22                      | IgG3    |
| Abs      | Putative light chain gene alleles |             |          | V (nt%)<br>mutation<br>frequency | LCDR3 aa sequence        | LCDR3<br>length<br>(aa) |         |
| PGZL1    | IGKV3-20*01                       |             | IGKJ5*01 | 12.6                             | QQYGTSQST                | 9                       |         |
| 4E10     | IGKV3-20*01                       |             | IGKJ2*01 | 4.7                              | QQYGQSLST                | 9                       |         |
| VRC42.01 | IGKV3-20*01                       |             | IGKJ1*01 | 5.7                              | QQYGGSFGT                | 9                       |         |
| 10E8     | IGLV3-19*01                       |             | IGLJ3*02 | 15.2                             | SSRDKSGSRLSV             | 12                      |         |
| DH511.2  | IGLK1-39*01                       |             | IGKJ2*03 | 15.7                             | QENYNTIPSL               | 11                      |         |
| DH517    | IGLV3-19*01                       |             | IGLJ2*01 | 13.4                             | ASRDRSGDRLGV             | 12                      |         |
| Z13      | IGKV3-11*01                       |             | IGKJ1*01 | 6.0                              | QQRSDWPRT                | 9                       |         |
| 2F5      | IGKV1D-13*02                      |             | IGKJ4*01 | 11.8                             | QLHFYPHT                 | 9                       |         |

N.D. Not determined

**Supplementary Table 3.** Unbiased antibody repertoire analysis of HIV-1-infected patient PG13 from Protocol G cohort<sup>a</sup>.

| Visit              | N <sub>read</sub> | N <sub>assign</sub> | Chain | N <sub>chain</sub> | <length>(nt) | Perc <sub>usable</sub> (%) |
|--------------------|-------------------|---------------------|-------|--------------------|--------------|----------------------------|
| #2<br>(18-18-2008) | 5,692,576         | 4,161,595           | H     | 2,026,540          | 554.2        | 58.2%                      |
|                    |                   |                     | κ     | 1,095,554          | 563.4        | 53.9%                      |
|                    |                   |                     | λ     | 1,039,501          | 581.8        | 56.7%                      |
| #4<br>(03-12-2009) | 4,412,667         | 3,486,756           | H     | 1,793,460          | 583.4        | 63.9%                      |
|                    |                   |                     | κ     | 882,793            | 570.1        | 58.5%                      |
|                    |                   |                     | λ     | 810,503            | 588.9        | 62.2%                      |
| #6<br>(05-18-2009) | 5,040,531         | 3,934,837           | H     | 1,715,839          | 583.8        | 66.6%                      |
|                    |                   |                     | κ     | 1,178,148          | 568.1        | 59.4%                      |
|                    |                   |                     | λ     | 1,040,850          | 589.0        | 60.4%                      |

<sup>a</sup> The unbiased antibody repertoire analysis was performed using a human 5'-RACE PCR procedure for library preparation on the Ion Chef instrument and long-read sequencing on the Ion GeneStudio S5 NGS platform. Listed items include the time point of the patient visit, total number of raw reads, number of remaining reads after germline gene assignment with a cutoff E-value of  $10^{-3}$ , antibody chain type (H, κ, and λ), number of antibody chains, average read length, and total number of usable sequences after Antibodyomics 1.0 pipeline processing and bioinformatics filtering with a V-gene alignment cutoff of 250 bp. Nine antibody chain libraries were barcoded according to three time points and pooled on one Ion 530 chip for the NGS experiment.

**Supplementary Table 4.** PGZL1-like heavy chain and light chain sequences selected from NGS lineage analysis.

| Type | Name  | NGS Idx | SHM (nt %) | Sequence identity (nt %) | Amino acid sequence of variable domain                                                                                          |
|------|-------|---------|------------|--------------------------|---------------------------------------------------------------------------------------------------------------------------------|
| HC   | V2H1  | 4140766 | 6.757      | 80.6                     | QVQLVQSGAEVKKPGSSVKVSKASGGTFSNDVIVSWVRQAPGQGLEWMGRVPIPLDITNYAQKFKQGRVITADKSTSTVYMDLSSLRSEDTAVYFCAREGEGWFGKPLRAFEVWGQGTITVSS     |
| HC   | V2H2  | 3634260 | 13.514     | 79.3                     | QVQLVQSGAEVKKPGSSVKVSKASGGTFSFYAISVWRQAPGQGLEWVGGIVPLVSTNYAQRFRGRVITADRSTSTVYLEMTGLTSADTAVYFCAREGEGWFGKPLRAFEVWGQGTITVST        |
| HC   | V2H3  | 1505330 | 19.257     | 76.1                     | KVQLVQSGAELKPKWSSVRVSKASGGSFSSYAFNWRQAPGQKLEWLGGIASLLVSRPSYAQRFRGRITISADRSTVYLEMTGLTSADTAVYFCAREGEGWFGKPLRAFEVWGQGTITVST        |
| HC   | V2H4  | 1592240 | 17.568     | 77.2                     | KVQLVQSGAELKPKWSSVRVSKASGGSFSSYAFNWRQAPGQRLEWLGGIVPLVSTNYAQRFRGRVITADRSTSTVYLEMTGLTSADTAVYFCAREGEGWFGKPLRAFEVWGQGTITVST         |
| HC   | V2H5  | 2499141 | 18.581     | 92.2                     | GVQLVQSGAEVKKPGSSMTVSKATGGTFSSLAFNWRQAPGQGPPEWMMGGICPVFSALVNYQRFQGRITIRADKSTTTVYLDLIRLTSDDTATYYCAREGEGWFGKPLRAFEVWGQGTITVSS     |
| HC   | V2H6  | 2684075 | 20.608     | 75.0                     | KVQLVQSGAEVKKRPGSSVTISCKDRGGSFSSYAFNWRQAPGQGLEWMMGGIIPILISIANYSRRFRGRVITADRSTSSIFLDLTRLTSVDTALYFCAREGEGWFGKPLGAFEFWGQGTAVTVTS   |
| HC   | V2H7  | 133943  | 21.622     | 95.2                     | GVQLVQSGAEVKKRPGSSVTISCKATGGTFSTLAFNWRQAPGQGPPEWMMGGIVPLFTIVNYGQRFQGRITIRADKSTTTVFLDLSGLTSADTATYYCAREGEGWFGKPLRALEIWGQGTITVSS   |
| HC   | V2H8  | 1537468 | 18.919     | 76.9                     | RVQLVQSGAEVKKRPGSSVTISCKDRGGSFSSYAFNWRQAPGQGLEWMMGGIIPILISIANYSRRFRGRVITADRSTSSIFLDLTRLTSVDTALYFCAREGEGWFGKPLGAFEFWGQGTAVTVTS   |
| HC   | V2H9  | 891566  | 23.986     | 74.5                     | KVQLVQSGAEVMRPGSSGYLSCKASGGSFSSYAFNWRQAPGQGLEWMMGGIIPILISIANYAEFRGRVITADRSTSSIFLDLTRLTSVDTALYFCAREGEGWFGKPLGAFEFWGQGTAVTVTS     |
| HC   | V2H10 | 2745751 | 25.676     | 73.1                     | RVQLVQSGAEVKKRPGSSVTIACKASGGSCSSYALHWERQARGQGLEWMMGGIMPPYRVANYAEELRGRVMTGDRSTSSIFLDLTRLTSVDTALYFCAREGEGWFGKPLGAFEFWGQGTAVTVTS   |
| HC   | V4H1  | 4221067 | 14.527     | 79.3                     | QVQLAQSGTEVKKPGSSVKVSKSSGGTSSNYAITVWRQAPGQGLEWMMGGIVPLVSTNYAQRFRGRVITADRSTSTVFMVEVIRLTSDDTAVYFCAREGEGWFGKPLRAFEVWGHGTAVTVSS     |
| HC   | V4H2  | 2042752 | 20.608     | 95.2                     | GVQLVQSGAEVNEGPSSVEVSKATGGTFSTLAFNWRQAPGQGPPEWMMGGIVPLFSIVNYGQRFQGRITIRADKSTTTVFLDLSRLTSADTATYYCAREGEGWFGKPLRALEIWGQGTITVSS     |
| HC   | V4H3  | 3465249 | 19.595     | 94.6                     | GVQLVQSGAEVKKRPGSSMTVSCRATGGTFSSLAFNWRQAPGQGPPEWMMGGIIVPLFRANIYQKQGRITIRADKSTTTIYLDLSSLTADTATYYCAREGEGWFGKPLRAFEVWGQGTITVSS     |
| HC   | V4H4  | 176346  | 18.243     | 78.0                     | KVQLVQSGAELKPKWSSVNEVSKVSGGSFSSYAFNWRQAPGQRLEWLGGIVPLVSTNYAQRFRGRITISADRSTSTVYLEMTGLTSADTAVYFCAREGEGWFGKPLRAFEVWGQGTITVST       |
| HC   | V4H5  | 1254417 | 20.946     | 75.5                     | KVQLVQSGAEVKKRPGSSVTISCKGRGGSFSSYAFNWRQAPGLGLEWMMGGIIPILISIANYAEFRGRVITADRSTSSIFLDLTRLTSVDTALYFCAREGEGWFGKPLGAFEFWGQGTAVTVTS    |
| HC   | V4H6  | 1122859 | 20.608     | 94.9                     | RVQLVQSGAEVKKRPGSSVTISCKATGGTFSTLAFNWRQAPGQGPPEWMMGGIVPLFTIVNYGQRFQGRITIRADKSTTTVFLDLSGLTSADTATYYCAREGEGWFGKPLRAFEVWGQGTITVSS   |
| HC   | V4H7  | 1501103 | 20.27      | 89.0                     | GVQLVASGAEVKKPGSSVEVSKATGGTFNSLAFNWRQAPGQGPPEWMMGGIVPLFSIVNYGQRFQGRITIRADKSTTTVYMDLNRLTSSDDTATYYCAREGEGWFGKPLRAFLQWGGQGTITVSS   |
| HC   | V4H8  | 3307001 | 23.649     | 75.8                     | KVQLVQSGAEVKKRPGSSVTISCKDGGSFSSYAFNWRQAPGQGLEWMMGGIIPILISSTNYAEKFRGRVITADRSTSSIFLDLTRLTSADTALYFCAREGEGWFGKPLGAFEFWGQGTAVTVTS    |
| HC   | V6H1  | 1008039 | 20.946     | 77.2                     | KVQLVQSGDVKLPWSSVRVSKASGGSFSSYAFNWRQAPGQRLEWLGGIVPLVSTNYAQRFRGRVITADRSTSTVYLEMTGLTSADTAVYFCAREGEGWFGKPLRAFEVWGQGTITVSVST        |
| HC   | V6H2  | 1199275 | 19.932     | 76.9                     | KVQLVQSGAELKPKWSSVRVSKASGGSFSSYAFNWRQAPGQRLEWMMGGIIVPLVSTNYAQRFRGRITISADRSTSTVYLEMTGLTSADTAVYFCAREGEGWFGKPLRAFEVWGQGTITVAVST    |
| HC   | V6H3  | 1330540 | 21.284     | 76.9                     | KVQLVQSGAELKPKWSSVRVSKATGGSFSSYAFNWRQAPGQRLEWLGGIVPLVSTNYAQRFRGRITISADRSTSTVYLEMTGLTSADTAVYFCAREGEGWFGKPLRAFEVWGQGTITVST        |
| HC   | V6H4  | 1944093 | 21.284     | 76.6                     | KVQLVQSGAEVKKRPGSSVTISCKASGGSFSSYAFNWRQAPGLGLEWMMGGIIPILISIANYQRRFRGRVITADRSTSSIFLDLTRLTSVDTALYFCAREGEGWFGKPLGAFEFWGQGTAVTVTS   |
| HC   | V6H5  | 1151354 | 19.595     | 76.6                     | KVQLVQSGAELKPKWSSMRVSKASGGSFSSYAFNWRQAPGQRLEWLGGIVPLVSTNYAQRFRGRITISADRSTSTVYLEMTGLTSADTAVYFCAREGEGWFGKPLRAFEVWGQGTITVTVSA      |
| HC   | V6H6  | 774842  | 19.932     | 93.0                     | GVQLVQSGAEVKKPGSSVTISCKATGGTFSSLAFNWRQAPGQGPPEWMMGGIIVPLFSIVNYGQRFQGRITIRADKSTTTVYLDLIRLTSDDTATYYCAREGEGWFGKPLRAFEVWGQGTITVSS   |
| HC   | V6H7  | 1093434 | 20.270     | 89.8                     | GVQLVQSGAEVKKPGVSVTVSKATGGTFSSLAFNWRQAPGQGPPEWMMGGIIVPLFSIVNYAQRFRQGRITIRADKSTTTVYMDLNRLTSSDDTATYYCAREGEGWFGKPLRAFLQWGGQGTITVSS |
| HC   | V6H8  | 2421650 | 22.297     | 95.2                     | GVQLVQSGAEVKKRPGSSVEVSKATGGTFSTLAFNWRQAPGQGPPEWMMGGIVPLFTIVNYGQRFQGRITIRADKSTTTVFLDLSGLTSADTATYYCAREGEGWFGKPLRALEIWGQGTITVSS    |
| HC   | V6H9  | 3522135 | 24.662     | 73.4                     | KVQLVQSGAEMKRPSSVHAACKDRGGSFSSYAIWVRQARELGFPEWMMGGIIPILSRANYAQRFRGRVITAHSTSSIFLDLTRLTSVDTALYFCAREGEGWFGKPLGAFEFWGQGTAVTVTS      |
| KC   | V2K1  | 2224128 | 8.276      | 85.2                     | EIVLTQSPGTTLSLSPGERATLSCRASQSVSNYLAWYQQKPGQAPRLLIYRDLGRATGIPDRFSGSGSGTDFTLTISRLEPEDFAVYYCQQYGTSSQSTFGQGTREIR                    |
| KC   | V2K2  | 5128161 | 11.034     | 92.6                     | EIVLTQSPGTTLSLSPGERATLSCRASQSVSGGALAWYQQKAGQAPRLLIYDTSRATGVPGRFSGSGSETDFSLTISRLEPEDFAVYYCQQYGTSSQSTFGQGTREIR                    |
| KC   | V2K3  | 5476422 | 11.379     | 93.5                     | EIVLTQSPGTFALSPGERATLSCRASQSVSGGALAWYQQKAGQAPRLLIYDTSRATGVPGRFSGSGSETDFSLTISRLEPEDFAVYYCQQYGTSSQSTFGQGTREIR                     |
| KC   | V2K4  | 1507161 | 19.310     | 88.0                     | RIVLTQSPGTTLSLSPGARATLSCRASQSVSGGSLAWYQQKAGRAPRSVIYDAVRRATAIPGRFSGSGSETDFSLTISRLEPEDFAVYYCQQYGTSSQSTFGQGTREIR                   |
| KC   | V4K1  | 1064505 | 12.414     | 92.0                     | EIVLTQPPGNFWSLSPGQRATLSCRAGQSVSGGSLAWYQQKAGQAPRLLIYDTSRATGVRDRFSGSGSETDFSLTISRLEPEDFAVYYCQQYGTSSQSTFGQGTREMR                    |
| KC   | V4K2  | 2329152 | 12.414     | 92.0                     | EIVLTQSPVTTLSLSPGRGTTLSCRASQSVSGGSLAWYQQKPGQAPRLLIYDTSRATGVPGRFSGSGSETDFSLTISRLEPEDFAVYYCQQYGTSSQSTFGQGTREIR                    |
| KC   | V4K3  | 1219291 | 20.345     | 89.5                     | DIVLTQSPGRFSLSPERATLSCRASQSVSGGYVAWYQQKAGQAPRLLIYDYSRATGVPGRFSGSGSETDFSLTISRLEPEDFAVYYCQQYGTSSQSTFGQGTREIR                      |
| KC   | V6K1  | 1899647 | 9.655      | 82.1                     | EMVLTQSPGTTLSLSPGEGATLSCRASQSVVNSLAWYQQRPQAPRLLAIAASRRATGIPDRFSGSGSGTDFTLTISRLEPEDFAVYYCQQYGTSSQSTFGQGTREIK                     |
| KC   | V6K2  | 132411  | 3.103      | 85.5                     | EIVLTQSPGTTLSLSPGERATLSCRASQSVSSYLAWYQQKPGQAPRLLIYDAYIRATGIPDRFSGSGSGTDFTLTISRLEPEDFAVYYCQQYGTSSQSTFGQGTREIK                    |
| KC   | V6K3  | 2357651 | 10.345     | 81.5                     | RMVLTQSPGTTLSLSPGEGATLSCGASQSVVNSLAWYQQRPQAPRLLIILASRRRAAGIPDRFSGSGSGTDFTLTISRLEPEDFAVYYCQQYGTSSQSTFGQGTREIK                    |

**Supplementary Table 5.** Evaluation of neutralization breadth and potency of PGZL1, 4E10 and VRC01 on 130-member cross-clade pseudovirus panel using TZM-bl neutralization assay.

| Clade | Virus                     | IC <sub>50</sub> (µg/ml) |       |       |       |       | IC <sub>80</sub> (µg/ml) |       |       |       |       |
|-------|---------------------------|--------------------------|-------|-------|-------|-------|--------------------------|-------|-------|-------|-------|
|       |                           | PGZL1_gVmDmJ             | PGZL1 | H4K3  | 4E10  | VRC01 | PGZL1_gVmDmJ             | PGZL1 | H4K3  | 4E10  | VRC01 |
| A     | NIH-065_191955.A11        | 33.5                     | 1.89  | 0.476 | 0.011 | 0.091 | 119                      | 8.56  | 2.23  | 0.157 | 0.467 |
| A     | NIH-063_0330.v4.c3        | >200                     | 22.1  | 2.63  | 0.963 | 0.033 | >200                     | >50   | 10.5  | 4.17  | 0.130 |
| A     | NIH-066_191084.B7.19      | >200                     | 30.9  | 1.17  | 1.23  | 0.049 | >200                     | >50   | 5.94  | 9.04  | 0.188 |
| A     | NAC_BG505                 | >200                     | 16.7  | 2.40  | 1.15  | 0.056 | >200                     | >50   | 9.75  | 4.88  | 0.213 |
| A     | NIH-057_MS208.A1          | >200                     | 10.1  | 0.726 | 0.678 | 0.063 | >200                     | 45.6  | 2.84  | 2.86  | 0.252 |
| A     | NIH-064_0260.v5.c1        | >200                     | >50   | 7.75  | 0.227 | 0.124 | >200                     | >50   | 35.3  | 6.08  | 0.516 |
| A     | NAC_KNH1144               | >200                     | >50   | 18.0  | 11.5  | 0.134 | >200                     | >50   | >50   | 47.9  | 0.535 |
| A     | NAC_94UG103               | >200                     | 24.1  | 9.37  | 1.77  | 0.187 | >200                     | >50   | 36.6  | 7.48  | 0.752 |
| A     | NAC_92RW020               | >200                     | 20.8  | 3.86  | 2.14  | 0.206 | >200                     | >50   | 15.5  | 9.61  | 0.811 |
| A1    | NIH-060_Q789ENVd22        | >200                     | 20.2  | 3.19  | 1.61  | 0.025 | >200                     | >50   | 12.9  | 6.57  | 0.092 |
| A1    | NIH-058_Q23ENV17          | >200                     | 16.5  | 3.13  | 1.29  | 0.038 | >200                     | >50   | 12.7  | 5.37  | 0.148 |
| A1    | NIH-056_Q168ENVa2         | >200                     | 21.7  | 2.69  | 3.78  | 0.056 | >200                     | >50   | 10.9  | 15.1  | 0.218 |
| A1    | NIH-061_Q259ENVd2.17      | >200                     | >50   | 9.87  | 7.12  | 0.114 | >200                     | >50   | 38.1  | 28.9  | 0.449 |
| A1    | NIH-059_Q461ENVe2         | >200                     | 20.2  | 3.59  | 2.33  | 0.195 | >200                     | >50   | 14.3  | 9.31  | 0.776 |
| A1U   | NIH-117_T278.5            | >200                     | 23.5  | 3.49  | 1.48  | >50   | >200                     | >50   | 14.0  | 6.03  | >50   |
| AC    | NIH-100_6041.v3.c23       | >200                     | >50   | 2.66  | 5.48  | 0.023 | >200                     | >50   | 10.9  | 22.2  | 0.087 |
| AC    | NIH-099_3301.v1.c24       | >200                     | >50   | 19.8  | 20.3  | 0.112 | >200                     | >50   | >50   | >50   | 0.463 |
| AC    | NIH-102_6545.v4.c1        | >200                     | >50   | 7.56  | 2.35  | >50   | >200                     | >50   | 29.6  | 13.3  | >50   |
| AC    | NIH-101_6540.v4.c1        | >200                     | >50   | 5.50  | 5.63  | >50   | >200                     | >50   | 22.7  | 36.1  | >50   |
| ACD   | NIH-103_0815.v3.c3        | >200                     | 18.7  | 5.17  | 1.20  | 0.019 | >200                     | >50   | 20.5  | 6.31  | 0.070 |
| ACD   | NIH-104_3103.v3.c10       | >200                     | >50   | 18.0  | 8.11  | 1.53  | >200                     | >50   | >50   | 32.4  | 6.21  |
| AE    | NIH-073_C3347.c11         | 10.2                     | 0.055 | 0.036 | 0.034 | 0.063 | 41.3                     | 0.263 | 0.165 | 0.137 | 0.254 |
| AE    | NIH-080_BJOX025000.01.1   | 14.6                     | 7.13  | 0.379 | 0.377 | 6.04  | 59.9                     | 29.3  | 1.53  | 1.59  | 24.8  |
| AE    | NIH-075_CNE8              | 18.2                     | 0.247 | 0.041 | 0.087 | 0.126 | 72.2                     | 0.945 | 0.210 | 0.270 | 0.514 |
| AE    | NAC_92TH021               | 20.9                     | 2.12  | 0.235 | 0.348 | 0.324 | 79.9                     | 8.27  | 0.926 | 1.38  | 1.31  |
| AE    | NIH-081_BJOX028000.10.3   | 49.4                     | 5.16  | 0.583 | 0.450 | 0.141 | 199                      | 20.9  | 2.38  | 1.88  | 0.573 |
| AE    | NIH-078_BJOX015000.11.5   | 79.3                     | 2.59  | 0.079 | 0.165 | 0.060 | >200                     | 10.5  | 0.296 | 0.647 | 0.242 |
| AE    | NIH-079_BJOX010000.06.2   | 89.1                     | 1.66  | 0.199 | 0.438 | 1.77  | >200                     | 6.60  | 0.794 | 1.73  | 7.79  |
| AE    | NIH-074_C4118.c09         | 106                      | 8.37  | 0.424 | 0.322 | 0.050 | >200                     | 33.3  | 1.76  | 1.17  | 0.202 |
| AE    | NIH-069_C1080.c03         | 118                      | 1.73  | 0.171 | 0.328 | 1.40  | >200                     | 6.93  | 0.690 | 1.36  | 5.70  |
| AE    | NIH-077_BJOX009000.02.4   | 161                      | 3.97  | 0.522 | 0.389 | 0.565 | >200                     | 15.8  | 2.12  | 1.62  | 2.34  |
| AE    | NIH-068_620345.c01        | 170                      | 12.6  | 1.18  | 0.663 | >50   | >200                     | >50   | 4.95  | 3.06  | >50   |
| AE    | NIH-076_CNE5              | >200                     | 24.6  | 1.37  | 1.34  | 0.059 | >200                     | >50   | 6.58  | 5.90  | 0.238 |
| AE    | NIH-070_R2184.c04         | >200                     | 12.9  | 0.976 | 0.223 | 0.103 | >200                     | >50   | 5.15  | 0.762 | 0.413 |
| AE    | NIH-072_R3265.c06         | >200                     | 28.0  | 1.68  | 0.491 | 0.126 | >200                     | >50   | 8.33  | 2.00  | 0.502 |
| AE    | NIH-071_R1166.c01         | >200                     | 4.87  | 0.623 | 0.383 | 0.488 | >200                     | 19.5  | 2.52  | 1.77  | 1.95  |
| AG    | NIH-115_928.28            | 32.4                     | 1.38  | 0.252 | 0.112 | 0.249 | 125                      | 5.45  | 1.01  | 0.438 | 0.990 |
| AG    | NIH-118_T255.34           | 38.7                     | 3.35  | 0.453 | 0.326 | 0.229 | 148                      | 13.2  | 1.78  | 1.38  | 0.925 |
| AG    | NIH-116_T263.8            | 107                      | 2.02  | 0.166 | 0.206 | 0.124 | >200                     | 8.18  | 0.719 | 0.927 | 0.505 |
| AG    | NIH-108_T235.47           | 139                      | 1.54  | 0.538 | 0.248 | 0.021 | >200                     | 6.62  | 2.21  | 1.07  | 0.084 |
| AG    | NIH-114_T257.31           | >200                     | 29.6  | 2.65  | 1.03  | 1.61  | >200                     | >50   | 11.0  | 4.71  | 6.57  |
| AG    | NIH-107_T251.18           | >200                     | 43.0  | 4.52  | 0.905 | 2.02  | >200                     | >50   | 17.9  | 3.97  | 8.63  |
| AG    | NIH-106_T250.4            | >200                     | 13.9  | 2.53  | 0.756 | >50   | >200                     | >50   | 10.4  | 3.42  | >50   |
| AG    | NIH-119_T211.9            | >200                     | 13.2  | 2.66  | 1.20  | 12.8  | >200                     | >50   | 10.5  | 5.08  | >50   |
| B     | NAC_MN                    | 1.21                     | 0.023 | 0.005 | 0.005 | 0.010 | 19.3                     | 0.564 | 0.135 | 0.135 | 0.196 |
| B     | NAC_HxB2                  | 5.64                     | 0.121 | 0.026 | 0.021 | 0.022 | 22.1                     | 0.485 | 0.113 | 0.089 | 0.081 |
| B     | NIH-012_1012.11.TC21.3257 | 77.3                     | 13.3  | 2.51  | 2.06  | 0.081 | >200                     | >50   | 10.0  | 8.25  | 0.318 |
| B     | NAC_ADA                   | 88.5                     | 5.36  | 0.932 | 0.836 | 0.314 | >200                     | 21.8  | 3.71  | 3.34  | 1.31  |
| B     | NAC_WITO.33               | 112                      | 3.56  | 2.59  | 0.435 | 0.055 | >200                     | 15.1  | 10.4  | 1.82  | 0.228 |
| B     | NIH-006_AC10.0.29         | 116                      | 4.64  | 0.872 | 0.666 | 0.867 | >200                     | 18.8  | 3.50  | 2.73  | 3.52  |
| B     | NIH-003_SC422661.8        | 145                      | 16.8  | 3.66  | 2.78  | 0.124 | >200                     | >50   | 14.5  | 11.1  | 0.481 |
| B     | NAC_89.6                  | 162                      | 25.3  | 5.02  | 2.77  | 0.807 | >200                     | >50   | 19.9  | 10.9  | 3.30  |
| B     | NAC_BaL.26                | >200                     | >50   | 6.16  | 4.20  | 0.010 | >200                     | >50   | 25.2  | 17.1  | 0.037 |
| B     | NAC_RHPA4.7               | >200                     | >50   | 7.93  | 4.66  | 0.035 | >200                     | >50   | 31.7  | 19.3  | 0.137 |
| B     | NIH-014_6244.13.B5.4567   | >200                     | 1.31  | 0.353 | 0.077 | 0.045 | >200                     | 5.19  | 1.51  | 0.373 | 0.193 |
| B     | NAC_TRJO.58               | >200                     | >50   | 4.88  | 2.97  | 0.057 | >200                     | >50   | 19.9  | 11.6  | 0.223 |
| B     | NAC_92BR020               | >200                     | >50   | 10.3  | 2.57  | 0.059 | >200                     | >50   | 39.7  | 13.5  | 0.230 |
| B     | NIH-008_WEAU.d15.410.787  | >200                     | 10.0  | 1.52  | 0.621 | 0.076 | >200                     | 39.6  | 6.30  | 2.59  | 0.306 |
| B     | NAC_REJO.67               | >200                     | 10.7  | 3.39  | 1.87  | 0.106 | >200                     | 40.2  | 13.8  | 8.62  | 0.414 |
| B     | NIH-009_1006.11.C3.1601   | >200                     | 24.6  | 5.69  | 5.66  | 0.145 | >200                     | >50   | 23.0  | 22.7  | 0.571 |
| B     | NAC_SS1196.1              | >200                     | 5.40  | 0.640 | 0.990 | 0.166 | >200                     | 22.2  | 2.76  | 3.96  | 0.659 |
| B     | NAC_YU2                   | >200                     | >50   | 1.68  | 15.9  | 0.123 | >200                     | >50   | 20.8  | >50   | 0.690 |
| B     | NAC_JRCSF                 | >200                     | 13.4  | 1.69  | 0.823 | 0.172 | >200                     | >50   | 7.58  | 3.92  | 0.690 |
| B     | NAC_JRFL                  | >200                     | >50   | 12.6  | 17.8  | 0.141 | >200                     | >50   | >50   | >50   | 0.741 |
| B     | NIH-004_PVO.4             | >200                     | 49.0  | 7.05  | 9.59  | 0.192 | >200                     | >50   | 27.5  | 38.7  | 0.790 |
| B     | NAC_DH12                  | >200                     | 4.71  | 1.54  | 1.17  | 0.227 | >200                     | 19.0  | 6.35  | 4.89  | 0.898 |
| B     | NIH-005_TRO.11            | >200                     | 2.88  | 0.669 | 0.769 | 0.231 | >200                     | 11.8  | 2.68  | 3.08  | 0.912 |
| B     | NAC_SF162                 | >200                     | 12.8  | 2.43  | 1.97  | 0.262 | >200                     | 48.6  | 10.3  | 8.26  | 1.03  |
| B     | NIH-011_1056.10.TA11.1826 | >200                     | 3.72  | 0.595 | 0.688 | 0.372 | >200                     | 14.9  | 2.38  | 2.81  | 1.48  |
| B     | NIH-016_SC05.8C11.2344    | >200                     | 5.77  | 1.43  | 0.828 | 0.508 | >200                     | 24.6  | 5.71  | 3.44  | 1.98  |
| B     | NIH-013_6240.08.TA5.4622  | >200                     | 35.8  | 6.49  | 9.78  | 0.604 | >200                     | >50   | 26.4  | 40.3  | 2.62  |
| B     | NIH-007_CAANS342.A2       | >200                     | 34.0  | 7.61  | 2.84  | 0.691 | >200                     | >50   | 30.6  | 12.1  | 2.79  |
| B     | NIH-010_1054.07.TC4.1499  | >200                     | 5.15  | 1.23  | 1.35  | 0.909 | >200                     | 20.2  | 4.93  | 5.43  | 3.62  |
| B     | NIH-001_6535.3            | >200                     | 1.42  | 0.652 | 0.519 | 0.946 | >200                     | 4.69  | 1.88  | 3.29  | 3.70  |
| B     | NIH-015_62357.14.D3.4589  | >200                     | 27.2  | 4.53  | 2.87  | 1.74  | >200                     | >50   | 18.1  | 11.6  | 6.95  |
| B     | NIH-002_QHO692.42         | >200                     | 42.0  | 4.54  | 6.19  | 1.96  | >200                     | >50   | 18.1  | 25.0  | 7.93  |
| BC    | NIH-050_CNE21             | 97.8                     | 4.23  | 1.02  | 0.513 | 0.212 | >200                     | 17.8  | 4.36  | 2.15  | 0.848 |
| BC    | NIH-054_CNE53             | >200                     | 6.00  | 0.842 | 0.380 | 0.042 | >200                     | 23.9  | 3.40  | 1.52  | 0.166 |
| BC    | NIH-055_CNE58             | >200                     | 3.55  | 0.975 | 0.563 | 0.083 | >200                     | 14.5  | 4.10  | 2.24  | 0.331 |
| BC    | NIH-048_CNE19             | >200                     | 3.12  | 1.07  | 0.310 | 0.127 | >200                     | 12.1  | 4.30  | 1.43  | 0.512 |
| BC    | NIH-053_CNE52             | >200                     | 24.3  | 4.16  | 0.954 | 0.142 | >200                     | >50   | 16.7  | 3.85  | 0.565 |
| BC    | NIH-051_CNE17             | >200                     | 12.4  | 1.87  | 0.526 | 0.219 | >200                     | 48.6  | 7.46  | 2.23  | 0.904 |

TABLE S5  
(CONT'D)

Key (IC<sub>50</sub>/IC<sub>80</sub> in µg/ml)  
<0.1 0.1-1 1-10 10-50 50-200

| Clade | Virus                      | IC <sub>50</sub> (µg/ml) |        |        |       |        | IC <sub>80</sub> (µg/ml) |       |       |       |       |
|-------|----------------------------|--------------------------|--------|--------|-------|--------|--------------------------|-------|-------|-------|-------|
|       |                            | PGZL1_gVmDmJ             | PGZL1  | H4K3   | 4E10  | VRC01  | PGZL1_gVmDmJ             | PGZL1 | H4K3  | 4E10  | VRC01 |
| BC    | NIH-052_CNE30              | >200                     | 40.5   | 3.49   | 4.17  | 0.593  | >200                     | >50   | 14.1  | 16.6  | 2.38  |
| BC    | NIH-049_CNE20              | >200                     | 2.42   | 0.799  | 0.383 | 4.85   | >200                     | 9.50  | 3.26  | 1.58  | 20.2  |
| C     | NIH-030_HIV-0013095.2.11   | 0.552                    | 0.008  | 0.070  | 0.001 | 0.0002 | 4.60                     | 0.113 | 0.305 | 0.258 | 0.058 |
| C     | NIH-026_ZM135M.PL10a       | 0.879                    | 0.296  | 0.026  | 0.133 | 0.102  | 3.13                     | 2.08  | 0.195 | 0.936 | 0.379 |
| C     | NIH-017_Du156.12           | 6.97                     | 0.623  | 0.270  | 0.101 | 0.059  | 27.7                     | 2.50  | 1.08  | 0.447 | 0.230 |
| C     | NIH-019_Du422.1            | 56.8                     | 7.51   | 1.41   | 1.42  | >50    | >200                     | 30.5  | 5.65  | 5.66  | >50   |
| C     | NIH-018_Du172.17           | 75.2                     | 0.424  | 0.106  | 0.102 | >50    | 151                      | 1.60  | 0.422 | 0.474 | >50   |
| C     | NIH-032_HIV-16845.2.22     | 93.2                     | 0.4244 | 0.1047 | 0.097 | 0.9682 | >200                     | 2.468 | 0.718 | 0.653 | 4.252 |
| C     | NIH-039_Ce2060 G9          | 140                      | 15.0   | 0.541  | 1.24  | 0.109  | >200                     | >50   | 2.48  | 5.10  | 0.450 |
| C     | NAC_93IN905                | 159                      | 0.404  | 0.361  | 0.110 | 0.070  | >200                     | 2.20  | 1.51  | 0.472 | 0.280 |
| C     | NIH-029_HIV-001428.2.42    | >200                     | >50    | 9.12   | 5.54  | 0.019  | >200                     | >50   | 35.9  | 24.7  | 0.068 |
| C     | NIH-041_BF1266.431a        | >200                     | 48.8   | 5.59   | 2.47  | 0.028  | >200                     | >50   | 22.3  | 10.0  | 0.110 |
| C     | NIH-023_ZM249M.PL1         | >200                     | 12.7   | 2.27   | 1.44  | 0.050  | >200                     | >50   | 8.97  | 5.77  | 0.197 |
| C     | NIH-031_HIV-16055.2.3      | >200                     | 10.9   | 1.38   | 1.59  | 0.053  | >200                     | 42.6  | 5.68  | 6.57  | 0.206 |
| C     | NIH-043_ZM249M.B10         | >200                     | 6.26   | 1.47   | 1.11  | 0.071  | >200                     | 25.6  | 5.88  | 4.55  | 0.275 |
| C     | NIH-025_ZM109F.PB4         | >200                     | 7.36   | 1.54   | 0.703 | 0.074  | >200                     | 29.7  | 6.50  | 3.17  | 0.296 |
| C     | NIH-040_Ce703010054.2A2    | >200                     | 48.9   | 7.78   | 2.05  | 0.139  | >200                     | >50   | 30.1  | 12.5  | 0.595 |
| C     | NIH-036_Ce2010 F5          | >200                     | >50    | 5.20   | 14.4  | 0.153  | >200                     | >50   | 20.9  | >50   | 0.625 |
| C     | NIH-020_ZM197M.PB7         | >200                     | 1.91   | 0.805  | 0.226 | 0.170  | >200                     | 7.66  | 3.27  | 1.08  | 0.682 |
| C     | NIH-044_ZM247F.F7          | >200                     | 12.0   | 3.49   | 1.85  | 0.236  | >200                     | 48.2  | 14.0  | 7.50  | 0.945 |
| C     | NIH-046_1394C9G1(Rev.)     | >200                     | 7.87   | 2.67   | 2.58  | 0.280  | >200                     | 34.3  | 10.8  | 10.4  | 1.12  |
| C     | NIH-047_Ce704809221.1B3    | >200                     | 0.738  | 0.440  | 0.134 | 0.320  | >200                     | 3.10  | 1.81  | 0.557 | 1.28  |
| C     | NAC_IAVIC22                | >200                     | 15.2   | 2.20   | 1.21  | 0.348  | >200                     | >50   | 9.00  | 6.11  | 1.37  |
| C     | NIH-034_Ce0393 C3          | >200                     | 13.5   | 1.73   | 0.606 | 0.370  | >200                     | >50   | 7.68  | 2.56  | 1.46  |
| C     | NIH-045_7030102001E5(Rev.) | >200                     | 49.6   | 4.63   | 3.41  | 0.380  | >200                     | >50   | 18.4  | 15.7  | 1.49  |
| C     | NIH-021_ZM214M.PL15        | >200                     | 28.7   | 6.52   | 5.31  | 0.612  | >200                     | >50   | 26.3  | 21.2  | 2.42  |
| C     | NIH-024_ZM53M.PB12         | >200                     | >50    | 12.7   | 10.4  | 0.917  | >200                     | >50   | >50   | 42.6  | 3.63  |
| C     | NIH-035_Ce1176 A3          | >200                     | 31.7   | 11.3   | 1.74  | 1.25   | >200                     | >50   | 44.2  | 7.36  | 4.99  |
| C     | NIH-022_ZM233M.PB6         | >200                     | 5.90   | 1.75   | 1.05  | 1.41   | >200                     | 23.6  | 7.36  | 4.99  | 5.69  |
| C     | NIH-027_CAP45 G3           | >200                     | 18.3   | 1.95   | 0.886 | 1.92   | >200                     | >50   | 8.34  | 4.19  | 10.1  |
| C     | NIH-042_ZM246FD5           | >200                     | 19.9   | 3.13   | 1.68  | 10.7   | >200                     | >50   | 12.7  | 6.70  | 43.7  |
| C     | NIH-028_CAP210.E8          | >200                     | 16.7   | 1.82   | 0.847 | >50    | >200                     | >50   | 7.22  | 3.53  | >50   |
| C     | NIH-038_Ce1172 H1          | >200                     | 0.948  | 0.351  | 8.81  | >50    | >200                     | 6.60  | 1.34  | 4.56  | >50   |
| CD    | NIH-095_6480.v4.c25        | >200                     | 15.0   | 0.335  | 0.561 | 0.014  | >200                     | >50   | 1.61  | 3.04  | 0.054 |
| CD    | NIH-096_6952.v1.c20        | >200                     | 0.890  | 0.195  | 0.721 | 0.025  | >200                     | 4.70  | 0.779 | 3.50  | 0.097 |
| CD    | NIH-097_6811.v7.c18        | >200                     | >50    | 9.54   | 2.74  | 0.140  | >200                     | >50   | 39.2  | 17.0  | 0.558 |
| CD    | NIH-094_3817.v2.c59        | >200                     | 20.1   | 0.597  | 0.417 | >50    | >200                     | >50   | 2.74  | 2.12  | >50   |
| CD    | NIH-098_89.F1.2.25         | >200                     | >50    | 8.60   | 5.11  | >50    | >200                     | >50   | 33.2  | 21.7  | >50   |
| D     | NIH-089_3016.v5.c45        | 74.8                     | 2.40   | 0.375  | 0.915 | 0.058  | >200                     | 10.6  | 1.59  | 3.73  | 0.223 |
| D     | NIH-090_A07412M1.vrc12     | >200                     | 13.9   | 1.01   | 2.58  | 0.051  | >200                     | >50   | 4.05  | 10.4  | 0.216 |
| D     | NIH-091_231965.c01         | >200                     | >50    | 6.70   | 13.8  | 0.183  | >200                     | >50   | 27.0  | >50   | 0.743 |
| G     | NIH-086_X2131 C1 B5        | 14.3                     | 0.885  | 0.148  | 0.194 | 0.073  | 57.7                     | 3.50  | 0.626 | 0.765 | 0.284 |
| G     | NIH-082_X1193 c1           | 29.7                     | 5.31   | 0.632  | 0.359 | 0.098  | 121                      | 21.3  | 2.62  | 1.43  | 0.408 |
| G     | NIH-084_X1254 c3           | >200                     | 45.5   | 6.06   | 2.88  | 0.039  | >200                     | >50   | 24.2  | 11.8  | 0.149 |
| G     | NIH-083_P0402 c2.11        | >200                     | 8.29   | 0.382  | 0.084 | 0.040  | >200                     | 32.3  | 1.82  | 0.363 | 0.164 |
| G     | NIH-087_P1981 C5.3         | >200                     | 1.39   | 0.147  | 0.099 | 0.203  | >200                     | 5.55  | 0.581 | 0.406 | 0.800 |
| G     | NIH-088_X1632 S2 B10       | >200                     | 15.5   | 3.02   | 2.57  | 0.338  | >200                     | >50   | 11.9  | 10.4  | 1.35  |
| G     | NIH-085_X2088 c9           | >200                     | >50    | 19.3   | >50   | >50    | >200                     | >50   | >50   | >50   | >50   |
| -     | NAC_AMLV                   | >200                     | >50    | >50    | >50   | >50    | >200                     | >50   | >50   | >50   | >50   |
| -     | NAC_VSV                    | >200                     | >50    | >50    | >50   | >50    | >200                     | >50   | >50   | >50   | >50   |

IC<sub>50</sub>/IC<sub>80</sub> and Percent of Viruses Neutralized

|                                                     | PGZL1_gVmDmJ | PGZL1 | H4K3 | 4E10  | VRC01 | PGZL1_gVmDmJ | PGZL1 | H4K3 | 4E10 | VRC01 |
|-----------------------------------------------------|--------------|-------|------|-------|-------|--------------|-------|------|------|-------|
| # Viruses                                           | 130          | 130   | 130  | 130   | 130   | 130          | 130   | 130  | 130  | 130   |
| <b>Total Viruses Neutralized</b>                    |              |       |      |       |       |              |       |      |      |       |
| IC <sub>50</sub> /IC <sub>80</sub> < 200 µg/ml      | 36           | ND    | ND   | ND    | ND    | 16           | ND    | ND   | ND   | ND    |
| IC <sub>50</sub> /IC <sub>80</sub> < 50 µg/ml       | 15           | 109   | 130  | 129   | 118   | 6            | 61    | 124  | 124  | 117   |
| IC <sub>50</sub> /IC <sub>80</sub> < 10 µg/ml       | 5            | 54    | 122  | 122   | 116   | 2            | 26    | 72   | 92   | 113   |
| IC <sub>50</sub> /IC <sub>80</sub> < 1 µg/ml        | 2            | 13    | 48   | 64    | 104   | 0            | 5     | 16   | 20   | 81    |
| IC <sub>50</sub> /IC <sub>80</sub> < 0.1 µg/ml      | 0            | 3     | 7    | 10    | 44    | 0            | 0     | 0    | 1    | 10    |
| <b>Percent of Viruses Neutralized</b>               |              |       |      |       |       |              |       |      |      |       |
| IC <sub>50</sub> /IC <sub>80</sub> < 200 µg/ml      | 28           | ND    | ND   | ND    | ND    | 12           | ND    | ND   | ND   | ND    |
| IC <sub>50</sub> /IC <sub>80</sub> < 50 µg/ml       | 12           | 84    | 100  | 99    | 91    | 5            | 47    | 95   | 95   | 90    |
| IC <sub>50</sub> /IC <sub>80</sub> < 10 µg/ml       | 4            | 42    | 94   | 94    | 89    | 2            | 20    | 55   | 71   | 87    |
| IC <sub>50</sub> /IC <sub>80</sub> < 1 µg/ml        | 2            | 10    | 37   | 49    | 80    | 0            | 4     | 12   | 15   | 62    |
| IC <sub>50</sub> /IC <sub>80</sub> < 0.1 µg/ml      | 0            | 2     | 5    | 8     | 34    | 0            | 0     | 0    | 1    | 8     |
| Median IC <sub>50</sub> /IC <sub>80</sub>           | 76.3         | 9.2   | 1.69 | 1.01  | 0.139 | 66.0         | 13.2  | 6.58 | 4.17 | 0.561 |
| IC <sub>50</sub> /IC <sub>80</sub> (Geometric Mean) | 40.2         | 6.06  | 1.39 | 0.911 | 0.160 | 49.0         | 9.59  | 5.35 | 3.71 | 0.654 |



**Supplementary Table 6.** Impact of antibody washout on neutralization of HIV by PGZL1 gVmDmJ germline revertant

| Isolates             | IC <sub>50</sub> (µg/ml) |      | Fold change <sup>a</sup> |
|----------------------|--------------------------|------|--------------------------|
|                      | no wash                  | wash |                          |
| T255                 | 63.1                     | >200 | >3.2                     |
| X2131                | 85.7                     | >200 | >2.3                     |
| BJOX028000           | 37.1                     | >200 | >5.4                     |
| 928.28               | 0.50                     | 36.5 | 73                       |
| 1193                 | 33.2                     | 196  | 5.9                      |
| Du156.12             | 6.47                     | 103  | 16                       |
| BJOX025000           | 6.99                     | 63   | 9                        |
| HxB2                 | 2.12                     | 11.9 | 5.6                      |
| 92Th021              | 22.3                     | 74.6 | 3.4                      |
| Du156.12-<br>(VRC01) | 0.11                     | 0.16 | 1.5                      |

<sup>a</sup>MPER accessibility was determined by washing antibody-virion mixture prior to infecting TZM-bl cells. Pseudoviruses were incubated with antibody at 37°C for 30 min, and antibody-virion mixture was washed or not washed prior to infecting target cells. Impact of antibody wash-out on virus neutralization is shown as the fold change in IC<sub>50</sub>: (IC<sub>50</sub> wash)/(IC<sub>50</sub> no wash).

**Supplementary Table 7. X-ray data collection and refinement statistics for PGZL1 Fab variants**

| Complex                                                          | PGZL1 Fab                                                                         | PGZL1 Fab -<br>MPER <sub>671-683</sub>                                             | PGZL1 Fab -<br>MPER <sub>671-683</sub> -<br>06:0 PA       | H4K3 Fab                                                              | H4K3 Fab -<br>MPER <sub>671-683</sub>            | H4K3 Fab - 06:0 PA                                                | PGZL1_gVmdmJ<br>Fab - Protein G        | PGZL1_gVmdmJ<br>Fab - MPER <sub>671-683</sub> -<br>06:0 PA                         |
|------------------------------------------------------------------|-----------------------------------------------------------------------------------|------------------------------------------------------------------------------------|-----------------------------------------------------------|-----------------------------------------------------------------------|--------------------------------------------------|-------------------------------------------------------------------|----------------------------------------|------------------------------------------------------------------------------------|
| Lipid                                                            | -                                                                                 | -                                                                                  | 06:0 PA                                                   | -                                                                     | -                                                | 06:0 PA                                                           | -                                      | 06:0 PA                                                                            |
| Reservoir condition <sup>a</sup>                                 | 20% PEG 4000, 20% glycerol, 0.08 M sodium acetate pH 4.6, 0.16 M ammonium sulfate | 20 % PEG 4000, 20% glycerol, 0.08 M sodium acetate pH 4.6, 0.16 M ammonium sulfate | 0.1 M sodium acetate pH 5.5, 12% 2-methyl-2,4-pentanediol | 30% PEG 2000 MME, 0.1 M sodium acetate pH 4.6, 0.2 M ammonium sulfate | 0.2 M ammonium dihydrogen phosphate, 22% PEG3350 | 1.44 M ammonium sulfate, 0.01M cobalt chloride, 0.1 M MES pH 5.83 | 20% PEG3350, 0.2 M lithium citrate     | 0.1 M sodium acetate pH 4.6, 0.2 M ammonium sulfate, 30% PEG 2000 monomethyl ether |
| Cryoprotectant                                                   | 26% glycerol                                                                      | 26% glycerol                                                                       | 20% ethylene glycol                                       | 26% glycerol                                                          | 26% glycerol                                     | 26% glycerol                                                      | 26% glycerol                           | 26% glycerol                                                                       |
| <b>Data collection</b>                                           |                                                                                   |                                                                                    |                                                           |                                                                       |                                                  |                                                                   |                                        |                                                                                    |
| X-ray source beamline                                            | SSRL 9-2                                                                          | SSRL 9-2                                                                           | SSRL 9-2                                                  | SSRL 12-2                                                             | SSRL 12-2                                        | SSRL 12-2                                                         | SSRL 12-2                              | SSRL 12-2                                                                          |
| Detector                                                         | Dectris PILATUS 6M                                                                | Dectris PILATUS 6M                                                                 | Dectris PILATUS 6M                                        | Dectris PILATUS 6M                                                    | Dectris PILATUS 6M                               | Dectris PILATUS 6M                                                | Dectris PILATUS 6M                     | Dectris PILATUS 6M                                                                 |
| Wavelength (Å)                                                   | 0.97946                                                                           | 0.97946                                                                            | 0.97946                                                   | 0.97946                                                               | 0.97946                                          | 0.97946                                                           | 0.97946                                | 0.97946                                                                            |
| Temperature (K)                                                  | 110                                                                               | 110                                                                                | 110                                                       | 110                                                                   | 110                                              | 110                                                               | 110                                    | 110                                                                                |
| No. of crystals                                                  | 1                                                                                 | 1                                                                                  | 1                                                         | 1                                                                     | 2                                                | 1                                                                 | 1                                      | 1                                                                                  |
| Space group                                                      | C2                                                                                | P3 <sub>2</sub> 1                                                                  | C2                                                        | P2 <sub>1</sub>                                                       | P1                                               | I2 <sub>3</sub>                                                   | P2 <sub>1</sub>                        | C2                                                                                 |
| Unit cell (a, b, c; Å)<br>(α, β, γ; °)                           | 87.59, 96.02, 67.32<br>90, 120.18, 90                                             | 113.53, 113.53, 300.54<br>90, 90, 120                                              | 181.86, 43.93, 154.53<br>90, 92.49, 90                    | 52.36, 64.98, 68.00<br>90, 105.81, 90                                 | 55.34, 58.03, 98.73<br>87.94, 76.09, 72.52       | 276.20, 276.20, 276.20<br>90, 90, 90                              | 78.84, 107.49, 131.96<br>90, 94.61, 90 | 208.36, 37.92, 133.52<br>90, 93.68, 90                                             |
| Resolution range (Å)                                             | 37.04-1.40                                                                        | 44.13-3.65                                                                         | 44.10-3.42                                                | 35.51-1.45                                                            | 36.15-1.98                                       | 39.06-3.11                                                        | 39.67-2.47                             | 39.77-2.60                                                                         |
| Highest resolution shell <sup>a</sup>                            | 1.42-1.40                                                                         | 3.71-3.65                                                                          | 3.48-3.42                                                 | 1.48-1.45                                                             | 2.01-1.98                                        | 3.19-3.11                                                         | 2.53-2.47                              | 2.67-2.60                                                                          |
| No. measurements                                                 | 298,709 (10,546)                                                                  | 124,715 (5,414)                                                                    | 69,732 (3,564)                                            | 207,268 (4,944)                                                       | 276,332 (9,263)                                  | 201,006 (13,965)                                                  | 268,463 (18,466)                       | 90,892 (6,566)                                                                     |
| No. unique reflections                                           | 89,730 (3,906)                                                                    | 24,133 (1,203)                                                                     | 15,913 (810)                                              | 74,084 (2,908)                                                        | 72,569 (2,807)                                   | 61,847 (4,503)                                                    | 77,485 (5,460)                         | 30,972 (2,317)                                                                     |
| Redundancy                                                       | 3.3 (2.7)                                                                         | 5.2 (4.5)                                                                          | 4.4 (4.4)                                                 | 2.8 (1.7)                                                             | 3.8 (3.3)                                        | 3.3 (3.1)                                                         | 3.5 (3.4)                              | 2.9 (2.8)                                                                          |
| Completeness (%)                                                 | 95.4 (83.2)                                                                       | 93.1 (95.2)                                                                        | 93.4 (95.3)                                               | 95.4 (75.4)                                                           | 91.3 (70.7)                                      | 98.2 (97.8)                                                       | 97.7 (94.0)                            | 93.8 (95.2)                                                                        |
| R <sub>sym</sub> <sup>b</sup>                                    | 8.2 (89.1)                                                                        | 18.9 (92.7)                                                                        | 21.0 (88.7)                                               | 5.6 (69.9)                                                            | 8.3 (23.0)                                       | 11.4 (120.5)                                                      | 9.9 (94.7)                             | 15.3 (98.4)                                                                        |
| R <sub>pim</sub> <sup>c</sup>                                    | 5.2 (60.9)                                                                        | 9.1 (43.4)                                                                         | 11.0 (46.6)                                               | 3.9 (61.5)                                                            | 4.6 (14.1)                                       | 7.3 (79.2)                                                        | 6.2 (59.7)                             | 10.7 (73.1)                                                                        |
| CC <sub>1/2</sub> <sup>d</sup>                                   | 95.5 (80.7)                                                                       | 87.8 (68.5)                                                                        | 87.5 (57.2)                                               | 86.5 (49.5)                                                           | 94.9 (97.7)                                      | 99.5 (42.5)                                                       | 99.5 (52.6)                            | 98.7 (57.1)                                                                        |
| Signal to noise (⟨I/σI⟩)                                         | 7.8 (1.4)                                                                         | 7.3 (1.8)                                                                          | 6.6 (1.8)                                                 | 10.1 (1.1)                                                            | 12.6 (6.0)                                       | 9.8 (1.0)                                                         | 9.2 (1.5)                              | 6.4 (1.2)                                                                          |
| Solvent content (%)                                              | 51.1                                                                              | 56.4                                                                               | 60.9                                                      | 47.1                                                                  | 58.0                                             | 73.0                                                              | 64.4                                   | 54.2                                                                               |
| <b>Refinement</b>                                                |                                                                                   |                                                                                    |                                                           |                                                                       |                                                  |                                                                   |                                        |                                                                                    |
| No. reflections used for refinement                              | 89,715                                                                            | 24,115                                                                             | 15,906                                                    | 74,047                                                                | 72,539                                           | 61,813                                                            | 77,455                                 | 30,948                                                                             |
| R <sub>cryst</sub> <sup>e</sup> (%)                              | 14.8                                                                              | 26.0                                                                               | 21.4                                                      | 15.6                                                                  | 17.2                                             | 18.6                                                              | 16.9                                   | 25.7                                                                               |
| R <sub>free</sub> <sup>f</sup> (%)                               | 18.2                                                                              | 28.9                                                                               | 26.4                                                      | 19.1                                                                  | 21.1                                             | 22.8                                                              | 21.9                                   | 31.0                                                                               |
| <b>Model composition (asymmetric unit)</b>                       |                                                                                   |                                                                                    |                                                           |                                                                       |                                                  |                                                                   |                                        |                                                                                    |
| Fab or Fab-peptide complex                                       | 1                                                                                 | 4                                                                                  | 2                                                         | 1                                                                     | 2                                                | 4                                                                 | 3                                      | 2                                                                                  |
| Protein G                                                        | n/a                                                                               | n/a                                                                                | n/a                                                       | n/a                                                                   | n/a                                              | n/a                                                               | 3                                      | n/a                                                                                |
| Waters                                                           | 579                                                                               | -                                                                                  | -                                                         | 472                                                                   | 480                                              | 34                                                                | 396                                    | 71                                                                                 |
| Lipid                                                            | n/a                                                                               | n/a                                                                                | 2                                                         | n/a                                                                   | n/a                                              | 8                                                                 | n/a                                    | -                                                                                  |
| SO <sub>4</sub> or PO <sub>4</sub>                               | 1 (SO <sub>4</sub> )                                                              | 4 (SO <sub>4</sub> )                                                               | n/a                                                       | 2 (SO <sub>4</sub> )                                                  | 6 (PO <sub>4</sub> )                             | 14 (SO <sub>4</sub> )                                             | n/a                                    | 4 (SO <sub>4</sub> )                                                               |
| <b>B-values</b>                                                  |                                                                                   |                                                                                    |                                                           |                                                                       |                                                  |                                                                   |                                        |                                                                                    |
| Wilson plot (Å <sup>2</sup> )                                    | 17                                                                                | 95                                                                                 | 79                                                        | 17                                                                    | 27                                               | 90                                                                | 50                                     | 43                                                                                 |
| Overall mean isotropic (Å <sup>2</sup> )                         | 24                                                                                | 98                                                                                 | 79                                                        | 24                                                                    | 33                                               | 95                                                                | 52                                     | 49                                                                                 |
| Fab / Protein G mean isotropic (Å <sup>2</sup> )                 | 22 / (n/a)                                                                        | 99 / (n/a)                                                                         | 74 / (n/a)                                                | 24 / (n/a)                                                            | 33 / (n/a)                                       | 94 / (n/a)                                                        | 51 / 56                                | 48 / (n/a)                                                                         |
| Peptide mean isotropic (Å <sup>2</sup> )                         | n/a                                                                               | 78                                                                                 | 97                                                        | n/a                                                                   | 42                                               | n/a                                                               | n/a                                    | 71                                                                                 |
| Ions mean isotropic (Å <sup>2</sup> )                            | 46                                                                                | 104                                                                                | n/a                                                       | 75                                                                    | 60                                               | 166                                                               | n/a                                    | 51                                                                                 |
| 06:0 PA(s) mean isotropic (Å <sup>2</sup> )                      | n/a                                                                               | n/a                                                                                | 173                                                       | n/a                                                                   | n/a                                              | 150                                                               | n/a                                    | -                                                                                  |
| Waters mean isotropic (Å <sup>2</sup> )                          | 37                                                                                | -                                                                                  | n/a                                                       | 37                                                                    | 37                                               | 61                                                                | 49                                     | 38                                                                                 |
| <b>Estimated coordinate error r.m.s.d. from ideal values (Å)</b> |                                                                                   |                                                                                    |                                                           |                                                                       |                                                  |                                                                   |                                        |                                                                                    |
| Bond lengths (Å)                                                 | 0.011                                                                             | 0.003                                                                              | 0.002                                                     | 0.003                                                                 | 0.008                                            | 0.002                                                             | 0.005                                  | 0.002                                                                              |
| Bond angles (°)                                                  | 1.12                                                                              | 0.88                                                                               | 0.53                                                      | 0.93                                                                  | 0.92                                             | 0.53                                                              | 0.82                                   | 0.54                                                                               |
| <b>Ramachandran</b>                                              |                                                                                   |                                                                                    |                                                           |                                                                       |                                                  |                                                                   |                                        |                                                                                    |
| Most favored regions (%)                                         | 96.1                                                                              | 94.7                                                                               | 95.3                                                      | 96.7                                                                  | 97.1                                             | 95.3                                                              | 95.9                                   | 94.5                                                                               |
| Additional allowed regions (%)                                   | 3.3                                                                               | 4.0                                                                                | 3.3                                                       | 2.7                                                                   | 1.7                                              | 3.6                                                               | 3.3                                    | 4.2                                                                                |
| Disallowed regions (%)                                           | 0.6                                                                               | 1.3                                                                                | 1.4                                                       | 0.6                                                                   | 1.2                                              | 1.1                                                               | 0.8                                    | 1.3                                                                                |

<sup>a</sup> Values in parentheses correspond to the highest resolution shells

<sup>b</sup>  $R_{sym} = \sum_{hkl} \sum_{j=1,|N|} \langle |I_{hkl}| - I_{hkl}| / \sum_{hkl} \sum_{j=1,|N|} I_{hkl}| \rangle$ , where the outer sum (hkl) is taken over the unique reflections

<sup>c</sup>  $R_{pim} = \sum_{hkl} [1/(N-1)]^{1/2} \sum_{i=1,|N|} |I_{hkl}| - \langle I_{hkl} \rangle / \sum_{hkl} \sum_{i=1,|N|} |I_{hkl}|$

<sup>d</sup> CC<sub>1/2</sub> = Pearson Correlation Coefficient between two random half datasets

<sup>e</sup>  $R_{cryst} = \sum_{hkl} | |F_{o,hkl}| - k|F_{c,hkl}| | / \sum_{hkl} |F_{o,hkl}|$ , where  $|F_{o,hkl}|$  and  $|F_{c,hkl}|$  are the observed and calculated structure factor amplitudes, respectively

<sup>f</sup> R<sub>free</sub>, as for R<sub>cryst</sub>, but for a set of reflections (5% of the total) omitted from refinement  
Drop conditions prepared as described in Experimental Procedures

**Supplementary Table 8. Primers used in this study.**

| Oligo Name        | Oligo Sequence (5'-3')                                   |       |
|-------------------|----------------------------------------------------------|-------|
| 5' L-VH 1         | ACAGGTGCCCACTCCAGGTGCAG                                  | PCR1  |
| 5' L-VH 3         | AAGGTGTCCAGTGTGARGTGCAG                                  |       |
| 5' L-VH 4/6       | CCCAGATGGGTCTGTCCAGGTGCAG                                |       |
| 5' L-VH 5         | CAAGGAGTCTGTTCCGAGGTGCAG                                 |       |
| 3' CH1            | GGAAGGTGTGCACGCCGCTGGTC                                  |       |
| 5' LVL 1          | GGTCTGGGCCAGTCTGTGCTG                                    |       |
| 5' LVL 2          | GGTCTGGGCCAGTCTGCCCTG                                    |       |
| 5' LVL 3          | GCTCTGTGACCTCCTATGAGCTG                                  |       |
| 5' LVL 4/5        | GGTCTCTCTCSCAGCYTGTGCTG                                  |       |
| 5' LVL 6          | GTTCTTGGGCCAATTTTATGCTG                                  |       |
| 5' LVL 7          | GGTCCAATTCYAGGCTGTGGTG                                   |       |
| 5' LVL 8          | GAGTGGATTCTCAGACTGTGGTG                                  |       |
| 3' CL             | CACCAGTGTGGCCTTGTGGCTTG                                  |       |
| 5' LVK 1/2        | ATGAGGSTCCYGCCTCAGTGTGCTG                                |       |
| 5' LVK 3          | CTCTTCTCCTGCTACTCTGGCTCCAG                               |       |
| 5' LVK 4          | ATTTCTCTGTTGCTCTGGATCTCTG                                |       |
| 3' CK 543         | GTTTCTCGTAGTCTGCTTTGCTCA                                 |       |
| 5'Agel VH1/5      | CTGCAACCGGTGTACATTCCGAGGTGCAGCTGGTGCAG                   | PCR2  |
| 5'Agel VH3        | CTGCAACCGGTGTACATTCTGAGGTGCAGCTGGTGGAG                   |       |
| 5'Agel VH4        | CTGCAACCGGTGTACATTCCGAGGTGCAGCTGCAGGAG                   |       |
| 5'Agel VH3-23     | CTGCAACCGGTGTACATTCTGAGGTGCAGCTGTTGGAG                   |       |
| 5'Agel VH4-34     | CTGCAACCGGTGTACATTCCGAGGTGCAGCTACAGCAGTG                 |       |
| 3' IgG (internal) | GTTCCGGGGAAGTAGTCCCTTGAC                                 |       |
| 5' Agel VL 1      | CTGCTACCGGTTCTGGGCCAGTCTGTGCTGACKCAG                     |       |
| 5' Agel VL 2      | CTGCTACCGGTTCTGGGCCAGTCTGCCCTGACTCAG                     |       |
| 5' Agel VL 3      | CTGCTACCGGTTCTGTGACCTCCTATGAGCTGACWCAG                   |       |
| 5' Agel VL 4/5    | CTGCTACCGGTTCTCTCTCSCAGCYTGTGCTGACTCA                    |       |
| 5' Agel VL 6      | CTGCTACCGGTTCTTGGGCCAATTTTATGCTGACTCAG                   |       |
| 5' Agel VL 7/8    | CTGCTACCGGTTCCAATTCYAGRGTGTGGTGACYCAG                    |       |
| 3' XhoI CL        | CTCCTCACTCGAGGGYGGGAACAGAGTG                             |       |
| 5' Pan VK         | ATGACCCAGWCTCCABYCWCCCTG                                 |       |
| 3' CK 494         | GTGCTGTCTTGTCTGCTCTGCT                                   |       |
| SL 5' VH1         | gggtttcctgttgctattctcgaggggtgccaggtgCAGGTGCAGCTGGTGCAG   | PCR 3 |
| SL 5' VH1/5       | gggtttcctgttgctattctcgaggggtgccaggtgGAGGTGCAGCTGGTGCAG   |       |
| SL 5' VH3         | gggtttcctgttgctattctcgaggggtgccaggtgGAGGTGCAGCTGGTGGAG   |       |
| SL 5' VH3-23      | gggtttcctgttgctattctcgaggggtgccaggtgGAGGTGCAGCTGTTGGAG   |       |
| SL 5' VH4         | gggtttcctgttgctattctcgaggggtgccaggtgCAGGTGCAGCTGCAGGAG   |       |
| SL 5' VH 4-34     | gggtttcctgttgctattctcgaggggtgccaggtgCAGGTGCAGCTACAGCAGTG |       |
| SL 5' VH 1-18     | gggtttcctgttgctattctcgaggggtgccaggtgCAGGTTACAGCTGGTGCAG  |       |
| SL 5' VH 1-24     | gggtttcctgttgctattctcgaggggtgccaggtgCAGGTCCAGCTGGTACAG   |       |
| SL 5' VH3-33      | gggtttcctgttgctattctcgaggggtgccaggtgCAGGTGCAGCTGGTGGAG   |       |
| SL 5' VH 3-9      | gggtttcctgttgctattctcgaggggtgccaggtgGAAGTGCAGCTGGTGGAG   |       |
| SL 5' VH4-39      | gggtttcctgttgctattctcgaggggtgccaggtgCAGCTGCAGCTGCAGGAG   |       |
| SL 5' VH 6-1      | gggtttcctgttgctattctcgaggggtgccaggtgCAGGTACAGCTGCAGCAG   |       |
| SL 5' VH7-4-1     | gggtttcctgttgctattctcgaggggtgccaggtgCAGGTGCAGCTGGTGCATC  |       |
| SL 3' JH 1/2/4/5  | GATGGGCCCTTGGTGCTAGCTGAGGAGACGGTGACCAG                   |       |
| SL 3' JH 3        | GATGGGCCCTTGGTGCTAGCTGAAGAGACGGTGACCATTG                 |       |
| SL 3' JH 6        | GATGGGCCCTTGGTGCTAGCTGAGGAGACGGTGACCCTG                  |       |
| SL 5' VL 1        | TTTTTCTAGTAGCAACTGCAACCGGTGTACACCACTCTGTGCTGACTCAG       |       |
| SL 5' VL 2        | TTTTTCTAGTAGCAACTGCAACCGGTGTACACCACTCTGCCCTGACTCAG       |       |
| SL 5' VL 3        | TTTTTCTAGTAGCAACTGCAACCGGTGTACACTCCTATGAGCTGACTCAG       |       |
| SL 5' VL 4/5      | TTTTTCTAGTAGCAACTGCAACCGGTGTACACCACTCTGTGCTGACTCA        |       |
| SL 5' VL 6        | TTTTTCTAGTAGCAACTGCAACCGGTGTACACAATTTTATGCTGACTCAG       |       |
| SL 5' VL 7/8      | TTTTTCTAGTAGCAACTGCAACCGGTGTACACCACTGTGGTACTCAG          |       |
| SL 3' CL          | TGTTGGCTTGAAGCTCCTCACTCGAGGGCCGGGAACAGAGTG               |       |
| SL 5' VK 1-5      | TTTTTCTAGTAGCAACTGCAACCGGTGTACACGACATCCAGATGACCCAGTC     |       |
| SL 5' VK 1-9      | TTTTTCTAGTAGCAACTGCAACCGGTGTACACGACATCCAGTTGACCCAGTCT    |       |
| SL 5' VK 1D-43    | TTTTTCTAGTAGCAACTGCAACCGGTGTACACGCCATCCGGATGACCCAGTC     |       |
| SL 5' VK 2-24     | TTTTTCTAGTAGCAACTGCAACCGGTGTACACGATATTGTGATGACCCAGAC     |       |
| SL 5' VK 2-28     | TTTTTCTAGTAGCAACTGCAACCGGTGTACACGATATTGTGATGACTCAGTC     |       |
| SL 5' VK 2-30     | TTTTTCTAGTAGCAACTGCAACCGGTGTACACGATGTTGTGATGACTCAGTC     |       |
| SL 5' VK 3-11     | TTTTTCTAGTAGCAACTGCAACCGGTGTACACGAAATTTGTTGACACAGTC      |       |
| SL 5' VK 3-15     | TTTTTCTAGTAGCAACTGCAACCGGTGTACACGAAATAGTGATGACGCAGTC     |       |
| SL 5' VK 3-20     | TTTTTCTAGTAGCAACTGCAACCGGTGTACACGAAATTTGTTGACGCAGTCT     |       |
| SL 5' VK 4-1      | TTTTTCTAGTAGCAACTGCAACCGGTGTACACGACATCGTGATGACCCAGTC     |       |
| SL 3' JK 1/4      | AAGACAGATGGTGCAGCCACCGTACGTTTGTATCTCCACCTTGGTC           |       |
| SL 3' JK 2        | AAGACAGATGGTGCAGCCACCGTACGTTTGTATCTCCAGCTTGGTC           |       |
| SL 3' JK 3        | AAGACAGATGGTGCAGCCACCGTACGTTTGTATCTCCACCTTGGTC           |       |
| SL 3' JK 5        | AAGACAGATGGTGCAGCCACCGTACGTTTATCTCCAGTCTGCTGTC           |       |
